# Biodiversity Research and Innovation in Antarctica and the Southern Ocean

2020

Paul Oldham and Jasmine Kindness<sup>1</sup>

## Abstract

This article examines biodiversity research and innovation in Antarctica and the Southern Ocean based on a review of 150,401 scientific articles and 29,690 patent families for Antarctic species. The paper exploits the growing availability of open access databases, such as the Lens and Microsoft Academic Graph, along with taxonomic data from the Global Biodiversity Information Facility (GBIF) to explore the scientific and patent literature for the Antarctic at scale. The paper identifies the main contours of scientific research in Antarctica before exploring commercially oriented biodiversity research and development in the scientific literature and patent publications. The paper argues that biodiversity is not a free good and must be paid for. Ways forward in debates on commercial research and development in Antarctica can be found through increasing attention to the valuation of ecosystem services, new approaches to natural capital accounting and payment for ecosystem services that would bring the Antarctic, and the Antarctic Treaty System, into the wider fold of work on the economics of biodiversity. Economics based approaches can be criticised for reducing biodiversity to monetary exchange values at the expense of recognition of the wider values of biodiversity and its services. However, approaches grounded in the economics of biodiversity provide a transparent framework for approaching commercial activity in the Antarctic and introducing requirements for investments in the conservation of Antarctic biodiversity by those who seek to profit from it.

---

<sup>1</sup> Paul Oldham holds a PhD in anthropology from the London School of Economics and is an Industrial Fellow at the Manchester Institute of Innovation Research, Alliance Manchester Business School, Manchester University. He was Adjunct Senior Fellow at the Institute for Advanced Study of Sustainability, United Nations University at the time of the research. Jasmine Kindness holds an honours degree in anthropology from the London School of Economics and is an MSc Student in the Humanities and Social Sciences Department at Oxford Brookes University. The research was funded under the Biospolar Project, Research Council of Norway (RCN project number 257631/E10). The authors thank Dr. Andrew Marsh for assistance in interpreting industrial chemistry based patent documents discussed in this paper.

## 26 Introduction

27 This article examines the scientific and patent landscape for biodiversity based research  
28 and innovation in Antarctica and the Southern Ocean. The article is based on a review of  
29 150,401 scientific articles and 29,690 patent families that make reference to the Antarctic  
30 or Southern Ocean in the open access Lens database of scientific and patent literature.

31 The Antarctic region is an important focus of scientific research in the context of the  
32 biodiversity and climate change crisis [1]. The impacts of climate change on terrestrial and  
33 marine biodiversity may be both positive and negative, with particular concern emerging  
34 over non-native species in terrestrial Antarctica and environmental warming and ocean  
35 acidification in the marine environment [1]. Commercial activity in Antarctica includes  
36 tourism and the harvesting of marine genetic resources such as Antarctic krill and  
37 Antarctic toothfish [2–4]. The region has also been a focus for bioprospecting or research  
38 on the potentially useful properties of Antarctic biodiversity for the development of new  
39 and useful products [5–10]. The emergence of commercially oriented research and  
40 development has led to increased debates around the governance of research activity,  
41 ethics and benefit-sharing. Debates on the governance of research and benefit-sharing  
42 mirror debates on access to genetic resources and benefit-sharing under the United  
43 Nations Convention on Biological Diversity and its Nagoya Protocol, and related policy  
44 processes such as negotiations on a new treaty on marine biodiversity in areas beyond  
45 national jurisdiction under the United Nations Law of the Sea. From 2005 onwards  
46 bioprospecting has appeared on the agenda of the Antarctic Treaty Consultative Meeting  
47 (ATCM) of Contracting and Consultative Parties to the Antarctic Treaty System (ATS). The  
48 Antarctic Treaty System consists of a set of agreements that aim to ensure that the  
49 Antarctic is a “natural reserve, devoted to peace and science” for the benefit of human kind.  
50 However, to date, activity under the Antarctic Treaty System with respect to  
51 bioprospecting has been limited to information gathering by the Scientific Committee on  
52 Antarctic Research (SCAR).

53 The aim of this article is twofold. First, we improve the evidence base for debates on the  
54 governance of research in Antarctica and the Southern Ocean by making datasets of  
55 scientific and patent literature and taxonomic data about the Antarctic publicly available  
56 through the Open Science Framework. The datasets are intended to contribute to  
57 methodological development in areas such as scientometrics and machine learning based  
58 approaches to natural language processing [11–13,13–16].<sup>2</sup> We argue that further  
59 methodological development is desirable, including by data providers, in order to address  
60 weaknesses in data coverage and data quality.

61 Second, we examine the main features of the scientific and patent landscapes for Antarctica  
62 and the Southern Ocean with a focus on biodiversity based innovation. The paper argues  
63 that efforts to address commercial research and development could usefully be approached

---

<sup>2</sup> Available through the Biospolar Antarctic Literature and Patents repository at <https://osf.io/py6ve/>

64 in the wider context of the ecosystem services provided by Antarctic biodiversity [17–19].  
65 This could be extended to the application of natural capital accounting, presently being  
66 incorporated into Systems of National Accounting (SNAs), to the Antarctic [20]. The rise of  
67 ecosystem services and natural capital accounting is grounded in increasing recognition  
68 within the economics community that biodiversity and the services it provides are not free  
69 and must be paid for. If we accept that biodiversity is not a free good and that everyone  
70 must, proportionate to their means, pay something we are able to ask other questions, such  
71 as: how much, by whom, in what form and to what ends? This paper does not aim to  
72 answer these questions but contributes to the evidence base for deliberation on the  
73 opportunities to address issues of fairness, equity and benefit-sharing for biodiversity  
74 based research and development in Antarctica and the Southern Ocean.

## 75 **Methods**

76 This paper is a contribution from anthropology and data science that combines analysis of  
77 the scientific and patent literature with taxonomic data from the Global Biodiversity  
78 Information Facility (GBIF) on Antarctic biodiversity. The method consists of five main  
79 steps:

- 80 1. Capturing the raw universe of scientific and patent publications making reference to  
81 Antarctica and the Southern Ocean in multiple languages using the Lens open access  
82 database <https://www.lens.org/>;
- 83 2. Identifying and cleaning author, organisation, inventor and patent applicant names  
84 and linking with geospatial data sources using Microsoft Academic Graph (MAG) data  
85 tables (January 2019 release) from Microsoft Academic [21];<sup>i</sup>
- 86 3. Text mining the scientific literature and patent literature for taxonomic names with a  
87 focus on species names and a limited set of common names based on data from the  
88 Global Names Index (GNI) and GBIF;
- 89 4. Refining the data to focus on scientific literature and patent data containing a  
90 verifiable Antarctic species using a cleaned version of Antarctic country code AQ data  
91 from GBIF;
- 92 5. Text mining the results for Antarctic places names with a particular focus on patent  
93 data using data from the SCAR Composite Gazetteer of Antarctica (CGA) and the  
94 Geonames database of Antarctica (AQ) country code place names.

95 The steps above involved a number of elements and issues of interest to the data science  
96 community that can be summarised as follows.

97 Open access databases such as the Lens from Cambia and the Queensland University of  
98 Technology make it possible to search for data in multiple languages and to a more limited  
99 degree to search the full texts of scientific publications and patent documents. Based on a  
100 set of experimental tests the following multi-language query was developed to capture the  
101 available universe of publications about Antarctica and the Southern Ocean in multiple  
102 languages.

103

104

105 Antarctic\* OR "Southern Ocean" OR "South Pole" OR "alqarat alqatabiat aljanubia" OR Antarctique OR Antarktida  
106 OR Antarktidë OR Antarktisk OR Antarktika OR Antarktiki OR antarktisk OR Antarktisk OR Antarktisz OR Antarktyda OR  
107 Antartaice OR Antártica OR antártida OR Antártida OR Antártida OR Antartide OR Antartika OR Antartikako OR  
108 Jacaylku OR "Nam Сүс" OR "namgeug daelyug" OR Suðurskautslandið OR Ανταρκτική OR Антарктида OR  
109 Антарктик OR Антарктика OR Антарктикийн OR Антарктикот OR Антарктыда

110 The Lens Scholarly database aggregates data from a number of different sources including  
111 Microsoft Academic Graph (MAG), Crossref (for meta data), PubMed for medically focused  
112 literature and CORE (core.ac.uk) for open access full texts. The available fields of search  
113 vary across data sources with all except for CORE being confined to metadata fields such as  
114 title, abstract, keywords, affiliations, authors etc. Table 1 summarises the raw search  
115 results from the different sources.

Table 1: Antarctic Paper Counts by Type

| name                     | papers |
|--------------------------|--------|
| papers                   | 150401 |
| microsoft academic graph | 135150 |
| metadata                 | 122886 |
| CORE full texts only     | 27515  |
| pubmed                   | 16053  |
| pubmed central           | 2754   |

Note:

Metadata refers to Antarctic search terms in titles, abstracts, keywords, fields of study and MeSH terms.

116 In considering the raw data in Table 1 it is important to note two points. First, that the  
117 analysis in this paper is limited to the 135,150 papers from Microsoft Academic Graph. The  
118 reason for this is that the Lens does not directly provide access to affiliation data but it is  
119 possible to retrieve this data using the freely available Microsoft Academic Graph database  
120 tables. Second, cases where the Antarctic search query only appeared in CORE full texts  
121 merit more detailed investigation in future research. Except where they appear in  
122 Microsoft Academic Graph these texts are excluded from the quantitative analysis below.

123 The results of the search include any document that references Antarctica, the Southern  
124 Ocean or the South Pole anywhere in metadata (including author affiliations and

125 bibliographic references) or the available full texts from CORE. This will inevitably include  
126 sources of objective noise, such as references to the South Pole of Mars or Titan or  
127 negations such as “except Antarctica”, and subjective noise such as the exploration of the  
128 role Antarctica plays in the human imagination in literary or cultural studies that may not  
129 be of interest to some readers. A conventional approach to dealing with noise in  
130 bibliometrics/scientometrics is to attempt to exclude it at source. However, we adopted a  
131 different approach informed by the possibilities of the rise of machine learning approaches  
132 to natural language processing and their future application to polar research.

133 Machine learning based approaches to Natural Language Processing (NLP) involve training  
134 models to engage in probabilistic classification of texts and named entity recognition  
135 (e.g. place names, species names). At the time of writing popular libraries include keras,  
136 fasttext, scikit-learn and spaCy (among others). The key condition for training models is the  
137 availability of preferably large volumes of labelled texts for use in training, testing and  
138 evaluating models. Viewed from this perspective, raw data that includes noise that is close  
139 to the subject matter (e.g. the South Pole of Titan or “everywhere except Antarctica”) is  
140 valuable. Rather than excluding noise at source we therefore adopted the approach of  
141 leaving the data as is and adding logical TRUE/FALSE columns to the raw data table as  
142 labelled filters. The filters are based on text mining of publication metadata (titles,  
143 abstracts, author keywords, fields of study, MeSH (medical subject heading terms). Table 2  
144 displays the filters.

Table 2: Paper Counts by Subject (metadata only)

| <b>name</b>       | <b>papers</b> |
|-------------------|---------------|
| climate           | 37015         |
| taxonomic name    | 25662         |
| biodiversity      | 25233         |
| southern ocean    | 12939         |
| antarctic species | 12768         |
| arctic            | 10965         |
| mammal            | 8365          |
| planets           | 4579          |

Table 2: Paper Counts by Subject (metadata only)

| <b>name</b>        | <b>papers</b> |
|--------------------|---------------|
| birds              | 3758          |
| candida antarctica | 3751          |
| krill              | 3127          |
| seal               | 2848          |
| penguin            | 2559          |
| whale              | 1688          |
| acidification      | 652           |
| innovation         | 195           |
| ecosystem services | 122           |
| bioprospecting     | 99            |

Note:

Counts of terms appearing in paper metadata including titles, abstracts, keywords, fields of study and MeSH terms.

145

146 The aim of the filters is to allow a user to restrict the data to areas of interest. For example,  
147 'taxonomic name' is a filter for records containing a uninomial or binomial species name  
148 while 'antarctic species' refers to species that occur in Antarctica validated in the  
149 taxonomic data with an Antarctic location.

150 In the second step, data from the Lens was federated with Microsoft Academic Graph from  
151 Microsoft Academic (January 2019, release). Microsoft Academic Graph is based on data  
152 from the Bing search engine and is made available free of charge as a set of data tables that  
153 contain over 200 million scientific records. Federation was performed using a Databricks  
154 Apache Spark cluster on Microsoft Azure running R in RStudio with the *sparklyr* and

155 *tidyverse* packages on the master node [21–24]. Data federation focused on table joins  
156 between the Lens data and affiliations and authors tables of Microsoft Academic Graph  
157 using the shared identifier (the paperid). This yielded an affiliation table with 5,021  
158 identified organisations (affiliationid) and an authors table with 244,778 authors  
159 (authorid). One important and known limitation of Microsoft Academic Graph is that the  
160 affiliations data is incomplete [11]. Thus, 69,805 of the papers in the dataset were recorded  
161 with an affiliation id corresponding with 52% of the 135,150 papers. However, raw  
162 affiliation data is available in the authors table for the full MAG database. We used a multi-  
163 step process described in the OSF repository to improve coverage to 99,794 (74%) of  
164 Microsoft Academic Graph data for Antarctica. The majority of the outstanding 34,249  
165 papers were made up of book chapters, books and other data types that normally lack  
166 affiliation data (17,886). As a consequence, data on affiliations is incomplete and must be  
167 classified as indicative rather than definitive. While these results may give the  
168 scientometrics community reason for pause in using Microsoft Academic Graph, we would  
169 observe that interrogating these issues provides a basis for future improvements such as  
170 retrospective reindexing to pick up missing data.

171 With respect to patent data, at the time of the research the Lens included 115,915,955  
172 patent documents from 63,366,633 families (publications grouped onto the earliest patent  
173 filing in a set) from 115 countries including regional and international patent offices. To  
174 retrieve patent data the same query was performed using full text search (titles, abstracts,  
175 description and claims). This yielded a raw count of 52,701 documents in 25,463 patent  
176 families from the search terms. The Lens is also important as a source of patent data for  
177 innovation research because it indexes scientific publications that are cited by patent  
178 documents. When these documents were added the total count of patent families rose to a  
179 raw 29,690 families.<sup>3</sup>

180 Patent documents are commonly republished multiple times. Thus, a single application  
181 may be republished as a patent grant or with an administrative search report or correction.  
182 The same application may also be submitted to multiple countries where it will also be  
183 republished. This introduces radical multiplier effects into patent counts. Thus, the 29,690  
184 patent families in our raw set are linked to 163,615 later patent publications (family  
185 members). To control for this, patent analysts commonly reduce linked documents in a set  
186 or ‘family’ to the earliest first filing (known as the priority document). This article uses this  
187 approach. We added a “filing order” filter to the Lens patent data that reduces the original  
188 29,690 Lens patent family documents to the 26,120 earliest first filings. Finally, it is  
189 important to emphasise that patent data, by virtue of access to the full text, is typically  
190 noisier than searches of the metadata for scientific literature with terms such as “South  
191 Pole” having multiple uses.

192 Text mining of the scientific and patent literature was performed in R using the *spacyr*  
193 package that provides access to the Python *spaCy* library for machine learning and Natural  
194 Language Processing and the R *tidytext* package [25,26]. Text mining focused on the

---

<sup>3</sup> Publicly accessible at: <https://www.lens.org/lens/collection/179814>



195 identification of binomial and uninomial taxonomic names in texts followed by the  
196 identification of place names. This was performed by extracting noun phrases from the  
197 titles, abstracts, keywords, fields of study and MeSH terms for Lens records in the scientific  
198 literature. In the case of patent data, internal full text collections focusing on the US, the  
199 European Patent Office and the international Patent Cooperation Treaty were used to text  
200 mine the available titles, abstracts, descriptions and claims. To address memory issues  
201 when using *spaCy* with *spacyr* we used the *tidytext* package to parse texts into sentences,  
202 two word phrases (ngram 2) and words (ngram 1). It should be noted that approaches  
203 focusing on noun phrases are partly dependent on the language model (English) used for  
204 noun identification. We therefore expect room for improvement in data capture across  
205 multi-language sources.

206 Matching with taxonomic names and place names was performed using dictionary based  
207 approaches. Noun phrases were matched against a dictionary of just over 6 million  
208 binomial species names originally extracted from the Global Names Index (GNI) and its  
209 web service at <http://gni.globalnames.org/> [27]. The full list of binomials was derived from  
210 a copy of the Global Names Index kindly provided by David Remsen and Dmitry Mozzherin  
211 as leading developers of the wider Global Names Architecture. Individual words  
212 (uninomials) were chosen for matching with entries in the Families of Living Organisms  
213 (FALO) dataset from GBIF that consists of single or uninomial names for Kingdoms,  
214 (e.g. Animalia), Families (e.g. Ursidae for the bear family) etc. [28,29]. A 2014 species list  
215 from the World Register of Marine Species (WoRMS) database was used to add a filter for  
216 marine species in the literature and patent data tables. We would note that careful  
217 attention is required to improvements in the classification of marine species (e.g. to  
218 distinguish between terrestrial aquatic and marine organisms) in later updates of WoRMS  
219 when approaching this filter.

220 The raw results of text mining with dictionaries were passed to the GBIF API using the  
221 *taxize* package from ROpenSci to retrieve the taxonomic hierarchy [30]. One issue when  
222 retrieving the taxonomic hierarchy for thousands of species is that a single species name  
223 may match to multiple records (e.g. as synonyms or homonyms). However, it is impractical  
224 to manually review thousands of results when retrieving data. Fortunately, the return from  
225 *taxize* includes a 'multiple matches' column that identifies these cases. The multiple  
226 matches filter is retained in the taxonomic data tables to allow taxonomic specialists to  
227 review and, as necessary, refine the data.

228 Scientific and patent publications that include taxonomic names commonly include  
229 multiple names. This is particularly true in patent documents and presents the challenge  
230 that a particular organism may or may not occur or have been collected in the Antarctic.  
231 GBIF maintains a dataset of occurrence records (observations) with country code AQ that  
232 in May 2019 consisted of 2,729,211 occurrence records [31]. However, at that time, over 1  
233 million of the records were recorded at latitude -91 or -90 revealing unlikely and invalid  
234 records. To address this, the data was restricted to records containing a text entry for  
235 locality and a second data set for -60 latitude South was generated and combined [32]. To  
236 address noisy records a multi-step procedure was adopted involving removing inaccurate  
237 coordinates with the ROpenSci *CoordinateCleaner* package in R [33]. In the second step, the  
238 SCAR Composite Gazetteer of Antarctica (CGA) of 23,833 names, was used to text mine the



239 locality field in GBIF data and single occurrence records were manually reviewed in  
240 VantagePoint from Search Technology Inc. In the third step, single species occurrence  
241 records that lacked locality information were identified. In the fourth step, a filter was  
242 added for occurrences south of -60 degrees latitude as the demarcation point for the  
243 Southern Ocean and Antarctica. In the fifth step, a species occurrence count was added  
244 based on the observation that low species occurrence records that lack locality information  
245 are often noise. In a sixth step, a filter was added for fossil records based on the existing  
246 GBIF “basis of record” field. Occurrence records with a validated Antarctic location in the  
247 locality field became the basis for the ‘antarctic species’ filter applied across the dataset.  
248 The addition of an ‘occurrence count’ field allow the species related data to be  
249 progressively restricted to those with a validated Antarctic location in an ordered way.

250 As this summary of methodological steps makes clear, the federation of scientific literature,  
251 patent literature and taxonomic data involves a number of methodological challenges. It is  
252 also clear that while the rise of open access databases revolutionises the opportunities for  
253 this type of analysis at scale, there are a variety of limitations in the data sources. This  
254 means that the analysis presented in this paper is indicative rather than definitive.  
255 Nevertheless, highlighting these limitations presents opportunities to identify ways  
256 forward in improving data coverage and data quality to inform decision-making.

## 257 **Results**

258 Figure 1 displays an overview of the raw dataset for the Antarctic search terms. In Figure  
259 1A we can immediately observe that after a steep increase in the paper count to a peak in  
260 2014 of 7,468 publications the data displays a declining trend. However, in our view this  
261 will reflect data availability issues with Microsoft Academic Graph rather than an actual  
262 decline in publications referencing Antarctica. The reason for this is that a steep decline  
263 from around the same point is observable for non-Antarctic data. An explanation of this  
264 issue could usefully be added to the Microsoft Academic Graph documentation to improve  
265 certainty for users.

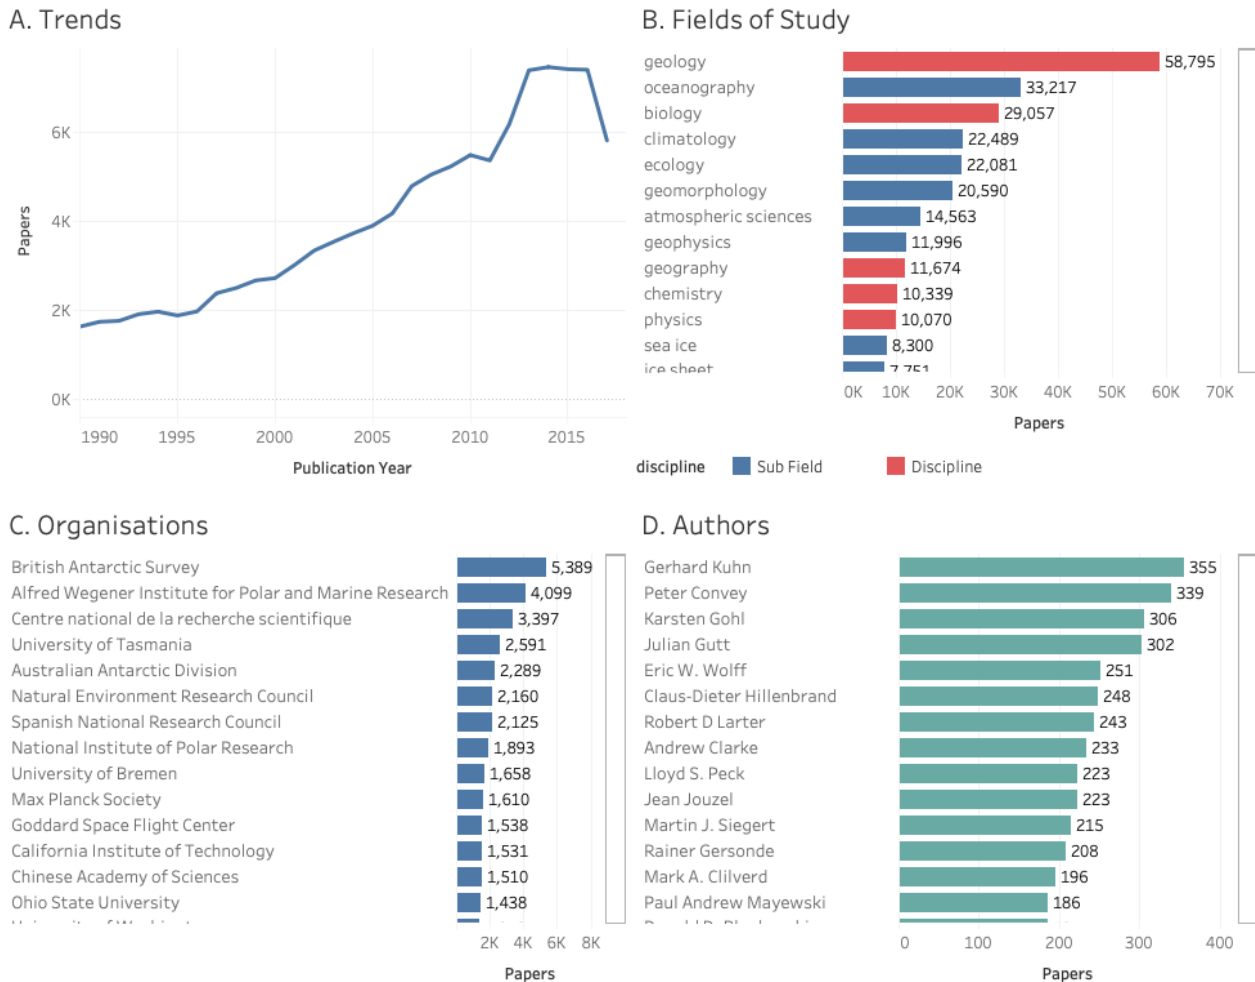

266

267

*Figure 1: Overview of Scientific Literature for Antarctica*

268 Microsoft Academic Graph uses a combination of data from Wikipedia and machine  
 269 learning to identify and label papers by subjects called “Fields of Study” [34]. In contrast  
 270 with approaches such as Clarivate Analytics Web of Science, that categorise journals rather  
 271 than papers, this approach allows for the use of multiple labels at different levels of detail  
 272 [34].

273 In the January 2019 release, MAG Fields of Study consisted of 19 top level disciplines that  
 274 are displayed in red in Figure 1B. The remaining fields, shown in blue, are children of the  
 275 MAG disciplines. Thus, in Figure 1B oceanography, climatology, geomorphology,  
 276 atmospheric sciences etc. are all children of geology. In contrast, ecology and botany are  
 277 children of biology. These children in turn have sub-child labels at varying levels of detail  
 278 including limited labels for taxonomic classification. Overall, this signifies that papers may  
 279 be divided into very broad fields and may appear multiple times in the rankings at different  
 280 levels of detail.

281 Figure 1C displays the available data on the number of papers per organisation. The data is  
 282 counted by aggregating the papers linked to an organisation (which may include multiple

283 authors from the same entity) and then counting the distinct papers. As noted above, it  
284 should be emphasised that this data is indicative rather than definitive. As the resolution of  
285 affiliation data improves we would expect the numbers and relative positions of  
286 organisations in the rankings to change. Nevertheless, the data is indicative of some of the  
287 most important organisations conducting research involving the Antarctic in recent  
288 decades.

289 Researchers from 134 countries appeared in the raw publication data relating to the  
290 Antarctic. However, rankings are affected by the availability of affiliation data. We can gain  
291 an initial idea of the geographic distribution of organisations involved by mapping  
292 organisations in the data that also appear in the public domain *Global Research Identifier*  
293 *Database (GRID)* <https://www.grid.ac/>. The GRID database forms part of a growing effort  
294 to harmonise institutional names for geographic mapping and other purposes. Figure 2  
295 breaks out the full data from Figure 1C and displays a map of available geographic data for  
296 organisations publishing research relating to Antarctica and is accompanied by a ranking of  
297 countries based on the number of distinct publications of all types linked to Antarctica.

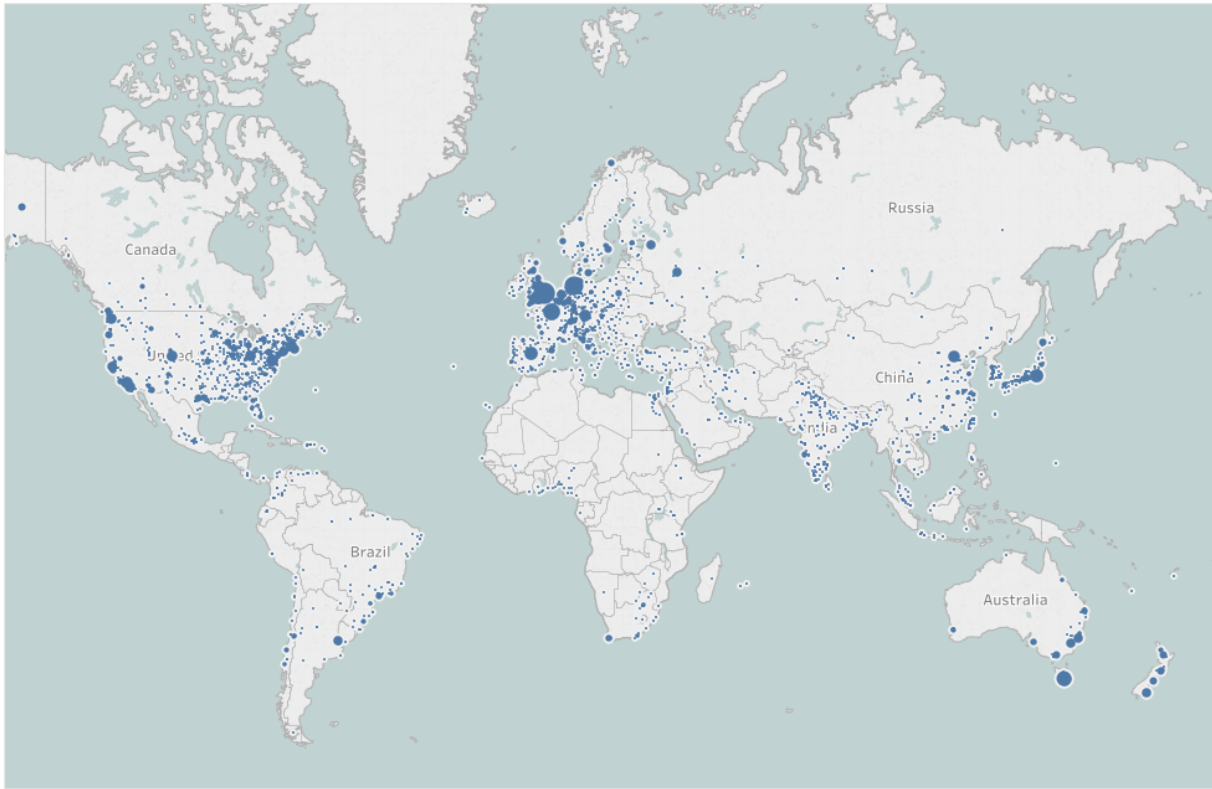

### Countries

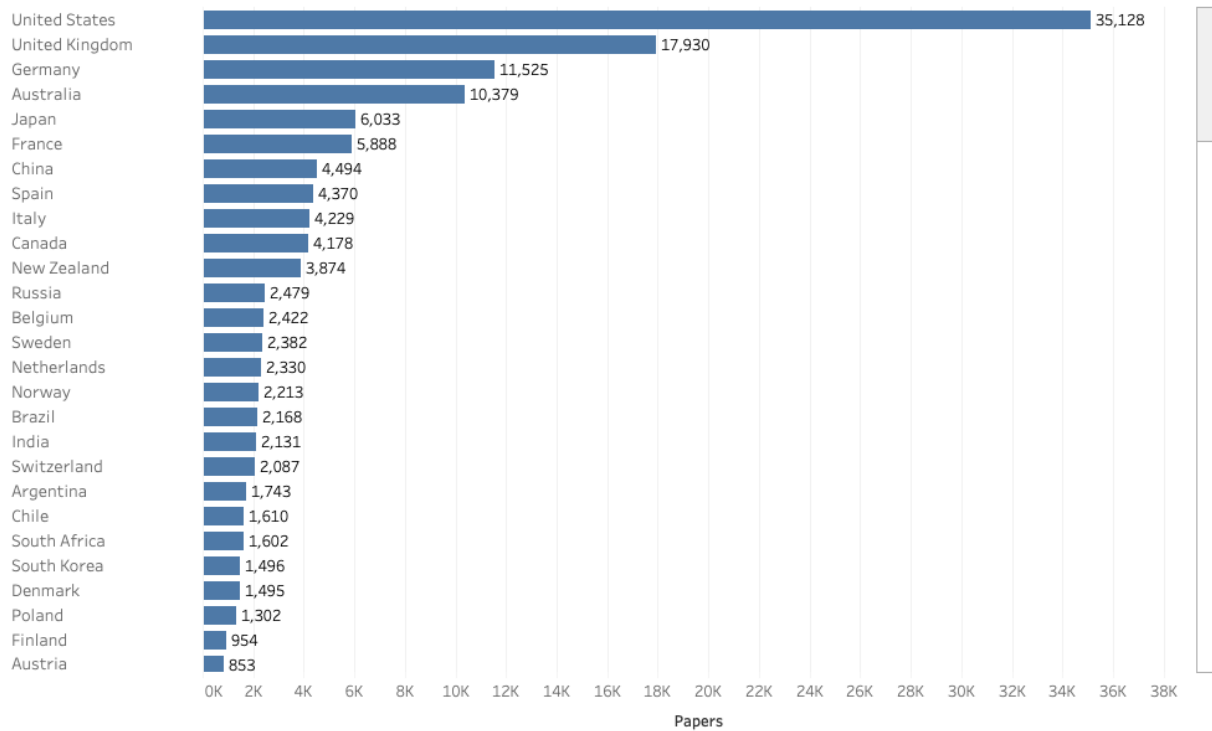

298

299

*Figure 2: Geographic Distribution of Research Organisations Linked to Antarctica*

300 It is worth noting that some countries with organisations with a significant presence in  
301 Antarctic research are probably under-represented in the organisation map because their  
302 data is distributed across multiple organisations with no available georeference data,  
303 notably Russia (with 63 organisations).

304 Figure 1D (above) displays the rankings of papers by individual authors. Top ranking  
305 authors, based purely on the number of published papers or datasets appearing in  
306 Microsoft Academic Graph, include marine geologist Gerhard Kuhn at the Alfred Wegener  
307 Institute Helmholtz Centre for Polar and Marine Research [35], terrestrial ecologist Peter  
308 Convey at the British Antarctic Survey [3,36], and geophysicist Karsten Gohl at the  
309 Wegener Institute [37,38]. Leading women scientists in the data by publication count  
310 include geophysicist Gabriele Uenzelmann-Neben at the Wegener Institute [39,40], marine  
311 biologist Katrin Linse at the British Antarctic Survey [41,42] and climate scientist Valerie  
312 Masson-Delmotte [43,44]. In some cases researchers may be active in research and  
313 publication on both Antarctica and the Arctic as part of wider polar research.

314 This global overview of research referencing the Antarctic serves to demonstrate the  
315 potential of tools such as the Lens and Microsoft Academic Graph to illuminate research  
316 landscapes on the global level. At the same time, data on trends, affiliations and  
317 georeferencing exposes the need for improvements in data quality and coverage. However,  
318 while recognising these constraints, this approach also significantly expands our access to  
319 data on scientific publications about the Antarctic. In an important contribution to  
320 bibliometric analysis Ji et al. 2014 published analysis of research on publications in the  
321 Antarctic between 1993 and 2012 using a search for the Antarctic in Web of Science that  
322 yielded 36,238 publications (after the exclusion of species containing antarctica in the  
323 name) [45]. In contrast, for the same period Microsoft Academic Graph produced 71,804  
324 distinct papers with 79,647 across the Lens. The increase in publication data will reflect a  
325 combination of the choice of search terms, the wider scope of Microsoft Academic Graph,  
326 the growing availability of data in multiple languages (with 46 languages represented in  
327 the data), the growing availability of millions of open access full texts through CORE  
328 (core.ac.uk), and the growing emphasis on open access data in scientific policies.

329 The increasing availability of publication data at scale brings with it a need to focus on  
330 potential sources of noise but also provides opportunities to drill into the data in specific  
331 areas of interest. Existing bibliometric research on the Antarctic has focused on the  
332 exploration of highly cited research [46], the role of research stations in promoting  
333 collaborative research [47], and mapping glacier research with Web of Science [48]. As this  
334 suggests, publication data on Antarctica provides rich opportunities for the exploration of  
335 specific research themes. We now turn to the analysis of research on Antarctica involving  
336 biodiversity at the species level as a basis for exploring commercial interest in Antarctic  
337 species in patent data.

338

### 339 **Biodiversity Research in Context**

340 As we observed above, the research profile for the Antarctic is dominated by geology,  
341 climatology and other Earth Science subjects. This is reflected in the top cited publications  
342 for Antarctica including topics such as: high resolution interpolated climate surfaces for  
343 global land areas [49], mixed effects modelling of ecology with R [50], the IPCC 4 report on  
344 *Climate Change 2007: Impacts, Adaptation, and Vulnerability*, global analysis of sea surface  
345 temperatures [51], and the climate and atmospheric history of the past 420,000 years from  
346 the Vostok ice core, Antarctica [52].

347 As we observed in the discussion of Antarctic fields of study, biology is a prominent subject  
348 area that is accompanied by a number of large subfields such as ecology, botany and  
349 biochemistry. Top cited research in the field of biology includes a new phylogenetic method  
350 for comparing microbial communities that includes comparison of Antarctic and Arctic  
351 communities [53], the influence of temperature on phytoplankton growth [54], sterol  
352 markers for marine and terrigenous organic matter [55], analysis of the genus  
353 *Nocardiopsis*, including discussion of *Nocardiopsis antarctica*, as a distinct Actinomycete  
354 lineage [56], and fatty acid trophic markers in the pelagic marine environment [57].

355 The main focus of the present research was on identifying and extracting species level  
356 information from research on the Antarctic using text mining. As a starting point, research  
357 on species can be divided into two broad categories: a) direct field research involving  
358 Antarctic species, and; b) indirect or follow on research, including classification and  
359 comparative analysis, and the exploration of the properties of organisms.

360 In total we identified 1,819 binomial species names with recorded occurrences in the  
361 scientific literature for the Antarctic. Of these, 1,666 had specific locality information. In  
362 the case of some animals such as whales, seals, penguins, and krill, common names,  
363 e.g. Blue whale or Adelie penguin, appear more frequently in the literature than their Latin  
364 names. To address this, additional counts were performed for the major groups including  
365 both common and taxonomic names and marked in the accompanying data table.  
366 Information on a public collection of biodiversity literature for Antarctica and the Southern  
367 Ocean is provided in the supplementary material.

368 Figure 3 displays the data ranked by species and the number of scientific publications for  
369 the 1,819 species.



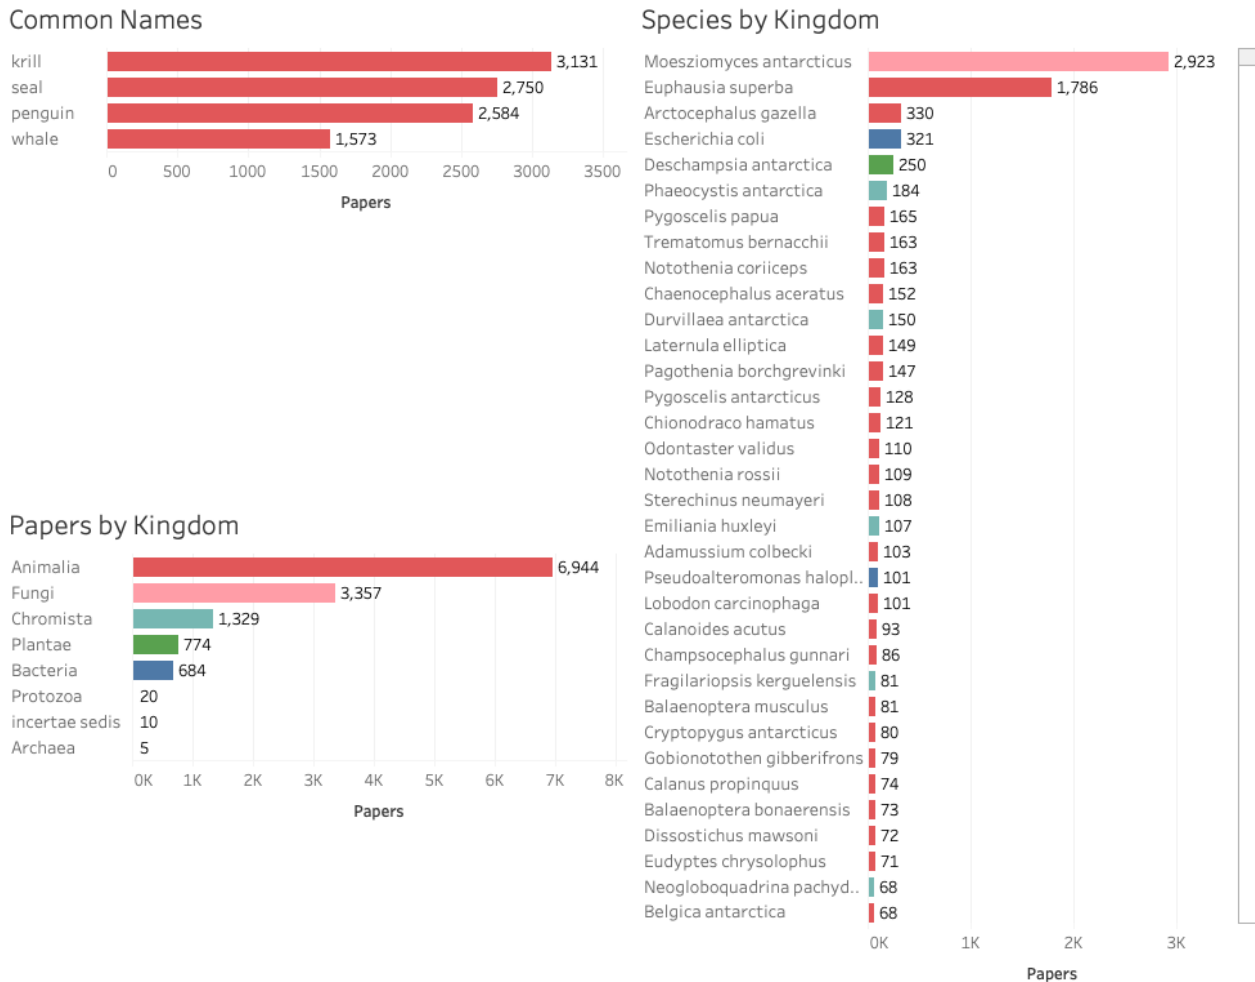

370

371

Figure 3: Top Ranking Species for Antarctica

372 The data in Figure 3 reveals the prominence of *Candida antarctica* (accepted name  
 373 *Moesziomyces antarcticus*) and krill (*Euphausia superba*) outside the major Antarctic  
 374 mammals. This reflects the economic importance of *Candida antarctica* and the ecological  
 375 and economic importance of krill.

376 We gain a more detailed insight into the prominence of species across the major kingdoms  
 377 in the scientific literature in Figure 4. We will now briefly summarise some of the highlights  
 378 of the literature and begin to focus in on research with commercial applications.

### Animalia

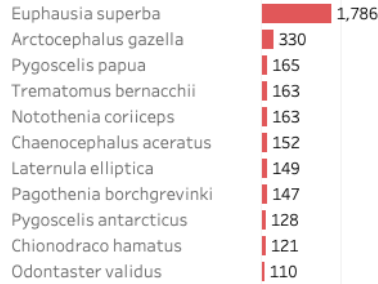

### Fungi

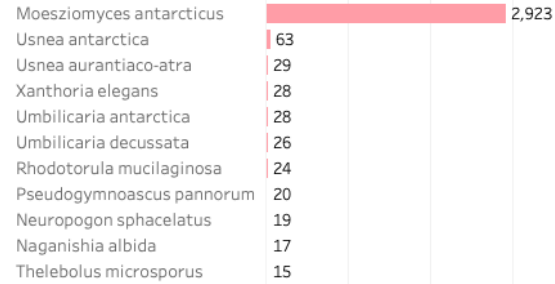

### Bacteria

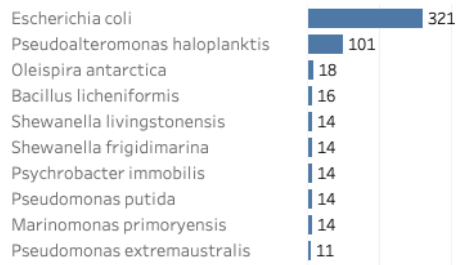

### Plantae

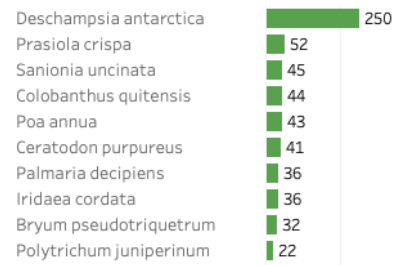

### Chromista

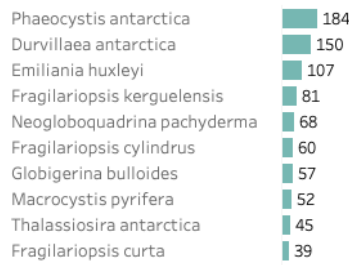

### Protozoa

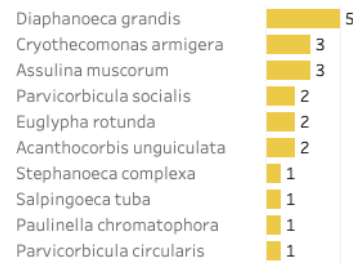

379

380

Figure 4: Top Ranking Species for Antarctica by Kingdom

381 For animals on both common and taxonomic names Antarctic krill is a major focus of the  
 382 literature that reflects significant economic interest in oil extraction from an abundant  
 383 species that is rich in omega-3 polyunsaturated fatty acids [58–60]. Much of the literature  
 384 on Antarctic krill details methods and success-rates in extracting proteins, fatty acids,  
 385 amino acids and lipids from this species. Additional work has focused on the suitability of  
 386 krill species as feed in salmon aquaculture [61,62]. The combination of climate change and  
 387 commercial exploitation has led to work to model the impacts of any decline in Antarctic  
 388 krill biomass on predators [63]. Antarctic krill are also a focus of the ecosystem-based  
 389 fisheries management approach of the Commission for the Conservation of Antarctic  
 390 Marine Living Resources (CCAMLR) [64]. Recent work on krill reveals concern that while  
 391 ecosystem services in the Southern Ocean may increase under climate change this may  
 392 occur at the expense of the decoupling of ecosystem provisioning for endemic species [65].  
 393 In other words, the food supply for endemic species may be disrupted leading to a need for  
 394 specific management of biodiversity [65].

395 The Antarctic fur seal, *Arctocephalus gazella*, a historic focus of the seal fur trade, has been  
396 a focus of basic research on foraging behaviour and diet with recent research examining  
397 the impact of human associated *Escherichia coli* in pinnipeds such as *A. gazella* [66–68].

398 In contrast, the Emerald rockcod (*Trematomus bernacchii*) is a focus of interest because it  
399 has lost the ability to produce heat shock proteins in response to thermal stress, a capacity  
400 once regarded as universal amongst organisms [69,70]. In total we identified 382 articles  
401 for Antarctic fish including notothenioids, such as *Notothenia coriiceps* and members of  
402 *Trematomus*, with cold adaptation as a significant focus of research (see below).

403 In the case of Fungi the data is dominated by *Candida antarctica*. *Candida antarctica* and  
404 *Pseudozyma antarctica* are synonyms for the accepted name *Moesziomyces antarcticus*. As  
405 the literature is dominated by the use of the synonym *Candida antarctica* we will continue  
406 with that practice. The type specimen for *Candida antarctica* was originally collected from  
407 sediment at 9 metres depth from Lake Vanda in Victoria Land, Antarctica (mycobank  
408 specimen record 19800). Lipases from this species have been used for a wide range of  
409 purposes. B-component lipase derived from this yeast has been found to be a significantly  
410 robust lipase. It is highly stereospecific, and has been used as a biocatalyst in a wide array  
411 of chemical reactions, with uses in biotechnology, bioengineering, biochemistry and  
412 biofuels.[71–75] *Candida antarctica* lipase B has also been found to be highly effective in  
413 aiding the dissolution of carbohydrates [77] and for the production of amines and amides.  
414 As Gotor Fernandez et. al. 2006 explain “Simplicity of use, low cost, commercial availability  
415 and recycling possibility make this lipase an ideal tool for the synthesis and resolution of a  
416 wide range of nitrogenated compounds that can be used for the production of  
417 pharmaceuticals and interesting manufactures in the industrial sector.” [78].

418 The most prominent bacteria in the Antarctic literature is the ubiquitous *Escherichia coli* or  
419 *E. coli*. The prominence of *E. coli* in the Antarctic literature mainly arises from its use as a  
420 research tool [79–81]. Examples of the use of *E. coli* in Antarctic research include a  
421 dosimeter to evaluate the penetration of biologically active ultraviolet radiation within a  
422 water column based on the sensitivity of a particular strain of *E. coli* to ultraviolet radiation  
423 [82]. However, *E. coli* also appears in the taxonomic record for Antarctica through records  
424 from Davis Station. Growing interest in the implications of the increasing presence of  
425 humans in Antarctica are reflected in exploration of the impacts of *E. coli* strains in human  
426 waste upon the Antarctic environment [68,83]. As noted above, the impacts of human  
427 associated *E. coli* have also become a focus of research in seal populations [68]. Research  
428 on the health of penguin populations has identified antibiotic resistant bacteria such as *E.*  
429 *coli* in Gentoo penguin breeding areas [84]. The discovery of antibiotic resistant strains of  
430 *E. coli* in penguin populations implies that human activities are responsible [84].

431 *Pseudoalteromonas haloplanktis*, recorded in the taxonomic record at Frei Montalva Base  
432 on King George Island, appears in over 100 publications. The majority of research tends to  
433 focus on the capacity of this species to exist at cold temperatures [85–87]. Beta-  
434 galactosidase from this species has been shown to outperform other commercial beta-  
435 galactosidases suggesting that the cold-adapted beta-galactosidase could be used to  
436 hydrolyse lactose in dairy products processed in refrigerated plants [88]. The bacterium  
437 *Oleispira antarctica*, recorded in the taxonomic record at Road Bay in the Ross Sea, appears

438 in 18 publications, two of which have received 150 or more citations suggesting significant  
439 interest. This interest appears to arise from *O. antarctica*'s hydrocarbon degrading  
440 properties which may be beneficial in the bioremediation of oil spills [89,90].

441 In the case of plants, Parnikoza et al. 2011 highlight that *Deschampsia antarctica* and  
442 *Colobanthus quitensis* are the only two flowering plants that have colonized the Maritime  
443 Antarctic [91]. As we will see below they are of significant commercial interest in  
444 connection with cold resistance [92]. *Deschampsia antarctica* appears in 250 papers and  
445 dominates the data on plants. Existing research suggests that *Deschampsia antarctica* may  
446 be useful as a bioindicator of climate change in Western Antarctica [93] while more recent  
447 work focuses on the mechanisms that allow it to survive in the Antarctic environment [94]  
448 and how these mechanisms fare in conditions of warming temperatures [95–97].  
449 Difficulties in the interpretation of the taxonomic record for Antarctica are reflected in the  
450 presence of the Australian seagrass *Amphibolis antarctica* in the raw taxonomic data which  
451 as far as we can establish, despite its name, does not have a recorded distribution in  
452 Antarctica or the Southern Ocean.

453 For chromists, single and multicellular eukaryotes including some algae and diatoms,  
454 scientific attention has focused on *Phaeocystis antarctica* and *Durvillaea antarctica* (New  
455 Zealand Bull Kelp). The marine phytoplankton *Phaeocystis antarctica* has been a focus of  
456 analysis in connection with the formation of algal blooms and carbon sequestration in the  
457 Southern Ocean and their role in the carbon cycle [98]. Recent work has focused on issues  
458 such as the role of iron in colony formation and the impacts of iron limitation and ocean  
459 acidification on *P. antarctica* [99,100]. This in turn is linked with wider research on the  
460 implications of ocean acidification for diatoms and other marine organisms in Antarctica  
461 [101]. Research on *P. antarctica* also involved simulation of iron fertilization that can be  
462 linked to models for geoengineering experiments [102,103].

463 *Durvillaea antarctica* appears to be quite widely distributed in the Southern Ocean and  
464 countries such as New Zealand and Chile. Research on this species includes work on kelp  
465 rafts in the Southern Ocean and subantarctic, including the role of kelp mats in the  
466 dispersal of marine bivalves [104,105]. More commercially oriented research is reflected in  
467 work on the nutritional content of the edible *D. Antarctica* [106]. The anaerobic digestion of  
468 this species to produce biogas has also been evaluated as a method for producing  
469 renewable energy [107]. Research has also been conducted to extract soluble  $\beta$ -1,3/1,6-D-  
470 glucan from this species, which has been indicated to have immunostimulant properties  
471 [108]. High-M alginate extracted from this species, which has also been shown to have  
472 immunostimulatory properties, has been used in studies to create a dietary supplement for  
473 feeding and weaning Atlantic cod [109].

474 Protozoans have received relatively little scientific attention in Antarctic research to date.  
475 *Diaphanoeca grandis* isolated from saline Antarctic lakes and coastal sites in research  
476 dating to the early 1990s has received the greatest attention so far [110–112]. Research on  
477 *Bicosta spinifera* dating to the early 1980s is also limited but has focused on issues such as  
478 seasonal variation in abundance [113] with more recent work reporting on the Polarstern  
479 project in the Weddell Sea [114]. In recent work, *Cryothecomonas armigera* is being used in

480 work to develop a bioassay to inform water specific guidelines to address pollution in  
481 Antarctica [115–117].

482 Research on Archaea, single celled microorganisms, in Antarctica appears to be very  
483 limited (not shown in Figure 4). The majority of research has focused on *Methanococoides*  
484 *burtonii*, with over 30 publications. However, a number of these papers have been  
485 relatively highly cited such as work on genomics, proteomics and membrane lipid analysis  
486 in understanding mechanisms for cold adaptation [118–120]. Additional work has also  
487 taken place on *Halorubrum lacusprofundi* focusing on amino acid substitutions in cold  
488 adapted proteins [121].

489 Viruses have very limited coverage in GBIF data and are therefore not picked up in text  
490 mining with this data source. However, as we might expect, research on viruses appears in  
491 472 publications for other species in the data . This includes viruses in Antarctic lakes  
492 [122], research on viruses and antibodies in Antarctic seals [123,124], a wider review of  
493 research on viruses in cetaceans [125,126] and research on viruses in penguin populations  
494 [127,128].

495 Our purpose in this section has been to provide a brief overview of biodiversity research in  
496 Antarctica and the Southern Ocean and to begin to focus on research activity with actual or  
497 potential commercial value. We turn now to the growing body of literature on  
498 bioprospecting, or biological research with a commercial focus, in the Antarctic.

## 499 **The Bioprospecting Literature**

500 A significant literature has emerged that makes reference to bioprospecting or biological  
501 prospecting in Antarctica, consisting of over 90 articles. These articles range from research  
502 with a specific focus on identifying the potentially useful properties of Antarctic organisms  
503 to consideration of the policy implications of commercially focused research and  
504 development for the Antarctic environment and benefit-sharing.

505 The most highly cited article on bioprospecting in the Antarctic is a 2013 analysis of fungal  
506 communities associated with macroalgae in Antarctica with potential bioactive compounds  
507 that has so far received 83 citations [129,130]. Other research is comparative in nature,  
508 such as comparing samples of soil bacteria from arid Brazilian and Antarctic soils that are  
509 capable of digesting cellulose [131,132]. Still other work focuses on methodological  
510 development such as improved culturing from metagenomic (environmental) samples  
511 from cold environments [133,134]. Innovation in research methods for bioprospecting  
512 research also extends to the use of genome editing techniques and single cell sequencing  
513 for organisms from terrestrial and marine ecosystems [135,135,136]. Work on methods  
514 and techniques frequently refers to polar regions rather than necessarily involving direct  
515 field research. This is also reflected in review articles on issues such as fungi from  
516 terrestrial and marine Antarctic environments [137]. Recent literature on bioprospecting  
517 that has yet to attract significant citations includes work on enzymes from filamentous  
518 fungi [138], Antarctic bacteria as a source of novel antibiotics [10], and as sources of  
519 antimicrobial, antiparasitic and anticancer agents [139,140]. We would emphasise that the  
520 literature using the term bioprospecting has not increased dramatically over the years



521 from the first record in 2002, with a peak of 8 publications in the available data for 2018  
522 and an average of 4 publications a year between 2002 and 2018. In our view the use of the  
523 term bioprospecting will prove to be an unreliable indicator for what we would prefer to  
524 call commercially oriented research and development focusing on the potential  
525 applications of the properties of Antarctic organisms.

526 Bioprospecting also became an increasing focus of policy research from the early 2000s  
527 onwards in connection with potential measures under the Antarctic Treaty System (ATS)  
528 and is situated in a wider emerging literature on the governance of areas beyond national  
529 jurisdiction [141,142]. This includes potential legal and policy measures [6,143]. The ethics  
530 of commercial exploitation of Antarctica and Southern Ocean resources has also recently  
531 emerged as an important topic notably in a 2020 special issue of *Ethics in Science and*  
532 *Environmental Politics* [144–147].

533 Debates about bioprospecting in Antarctica have been closely tied up with patent activity.  
534 In the economics literature patent activity is used as a proxy output indicator for otherwise  
535 invisible investments in research and development [6,7,148]. That is, the filing of a patent  
536 application is an outcome of underlying financial investments in research and development  
537 [6,7,148]. In contrast, in wider policy debates on biodiversity, the filing of a biodiversity  
538 based patent application has become associated with the concept of biopiracy, or  
539 misappropriation, of genetic resources from countries and communities for commercial  
540 gain without returning benefits to countries, communities or biodiversity conservation. We  
541 now turn to the available data on patent activity for biodiversity from the Antarctic.

## 542 **Patent Activity**

543 We identified patent activity referencing Antarctica using the search strategy described  
544 above across the full texts of patent documents worldwide. The raw data was reduced to  
545 29,690 applications and then further reduced to 26,120 earliest first filings that form the  
546 basis of patent families. We then text mined the documents for any type of species name  
547 and reduced the results to those with a verifiable occurrence in Antarctica or the Southern  
548 Ocean in the available taxonomic record from GBIF. We identified a total of 3,907 patent  
549 applications and 2,738 first filings that contained a verifiable Antarctic species. In total we  
550 identified 1,212 species in the patent data of which 354 were verifiable Antarctic species  
551 based on locality information in the taxonomic record.

552 In approaching this data we would note that the data on Antarctic species that formed the  
553 basis for the search will inevitably be incomplete. As discussed below, we also note that the  
554 appearance of an Antarctic species in a patent document does not necessarily mean that an  
555 element of that species is claimed by the applicants. We will begin with an overview of the  
556 patent data containing Antarctic species and then progressively narrow the focus before  
557 concluding with examples of direct collection of samples in Antarctica.

558 Figure 5 displays the counts of species appearing in the full texts of patent documents that  
559 are known to occur in Antarctica.



## Species

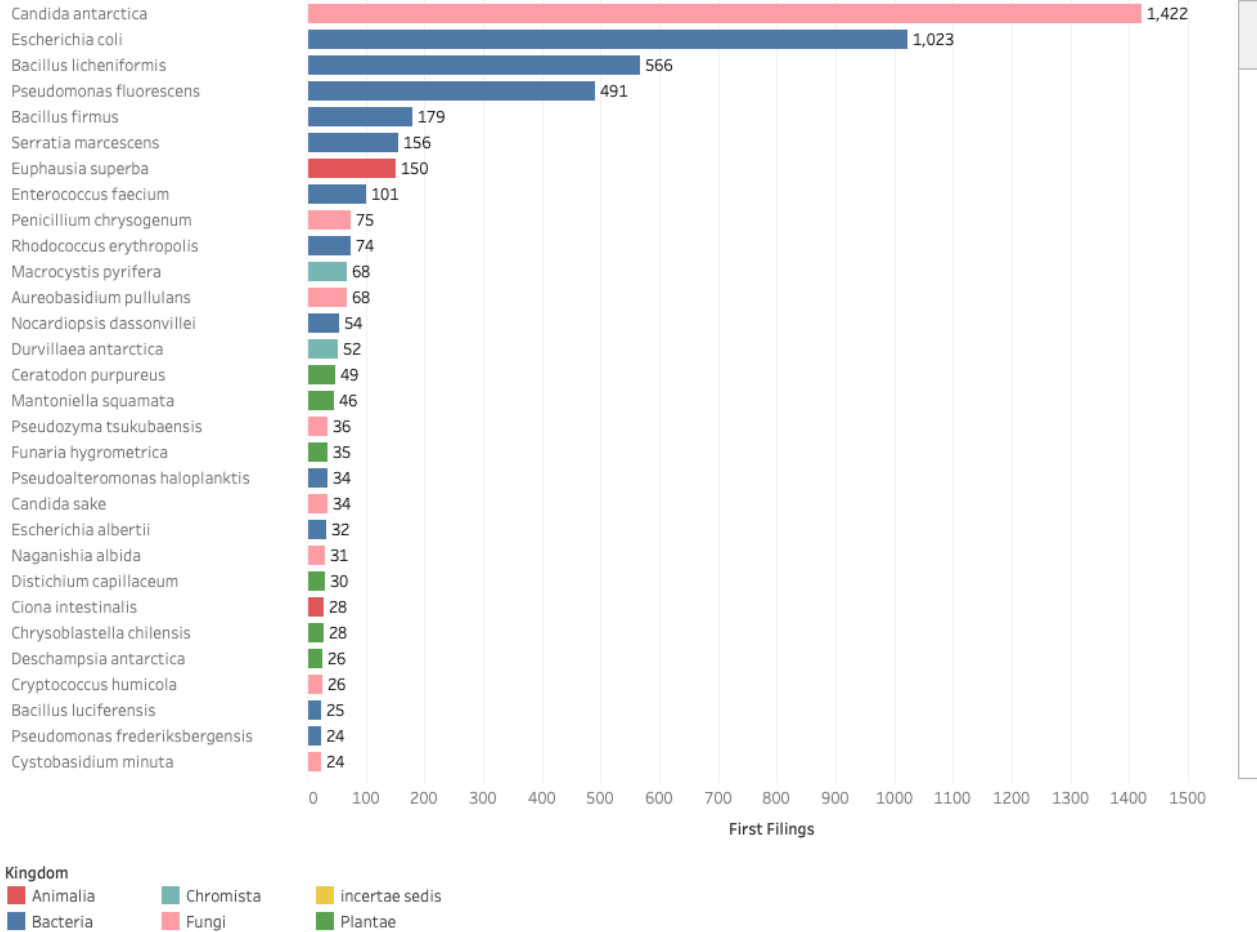

560

561

*Figure 5: Antarctic Species in Patent documents Ranked by First Filings*

562

563

564

565

566

567

Figure 5 reveals that, as we might expect from the scientific literature, the top species is *Candida antarctica* (accepted name *Moesziomyces antarcticus*). This is followed by the ubiquitous *E.coli*. The presence of widespread species such as *E. coli* will in our view reflect the use of this organism as a tool in biotechnology rather than specific strains from Antarctica. This will also be true for other widely distributed species that have been recorded in the Antarctic.

568

569

570

571

572

One important feature of patent activity is that a species may be mentioned in different sections of a document. As a general rule, patent documents that mention a species in the title, abstract or claims will in some fundamental sense involve that species in the invention, either as a source for the invention, such as a lipase, or as a target of the invention such as a pathogen. However, the main density of species references is found in

573 the description section. Figure 6 shows the breakdown of species names in the patent data  
 574 presented in Figure 5 by document section ranked on patent claims.<sup>4</sup>

### Species by Section

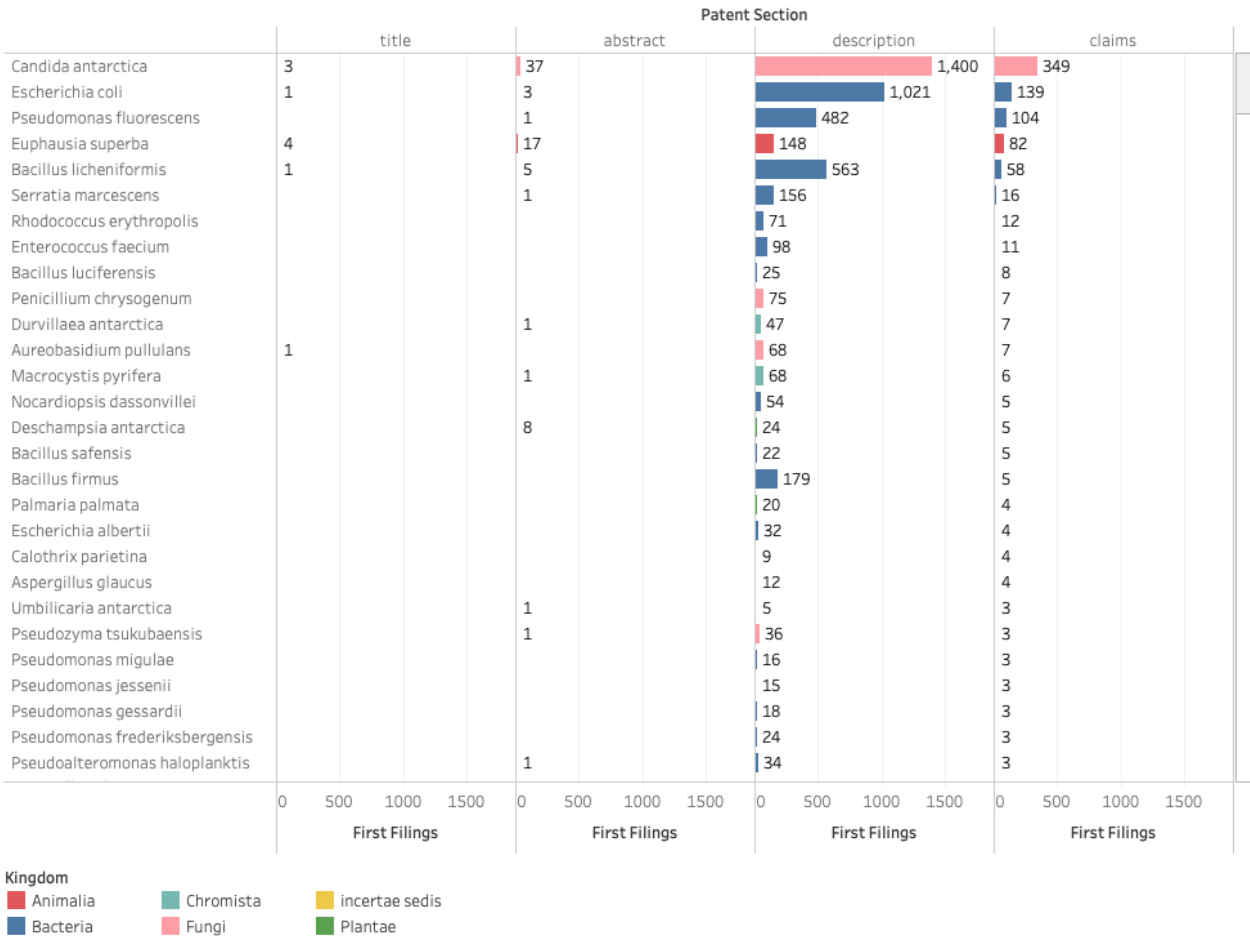

575

576 *Figure 6: Antarctic Species in Patent Documents by Section Ranked on Claims*

577 As Figure 6 reveals the majority of references to a species appear in the description section  
 578 with the remainder appearing in the claims.

579 References to species may appear in an application for a number of different reasons:

- 580 • As part of the claimed invention (the species is material to the invention);  
 581 • As part of experiments leading to the claimed invention;  
 582 • As an actual or potential component or ingredient in the invention, including in claims  
 583 constructed on the genus, family, phylum or higher taxonomic levels;

<sup>4</sup> Because a species name may appear in multiple parts of the same document the overall counts will be higher than the totals in Figure 5.

- 584 • Literature citations (see below);  
 585 • Passing references (e.g. “in every species except...”, or “species x has been used to do  
 586 y”) and long lists (notably for viruses);  
 587 • As DNA or amino acid sequences that are either used as comparative reference  
 588 sequences or claimed.

589 In practice, determining whether a species is material to a claimed invention requires close  
 590 attention to and interpretation of the texts. In the discussion below we provide examples of  
 591 the different reasons that a species may appear in the text. Figure 7 presents an overview  
 592 of the 2,738 first filings.

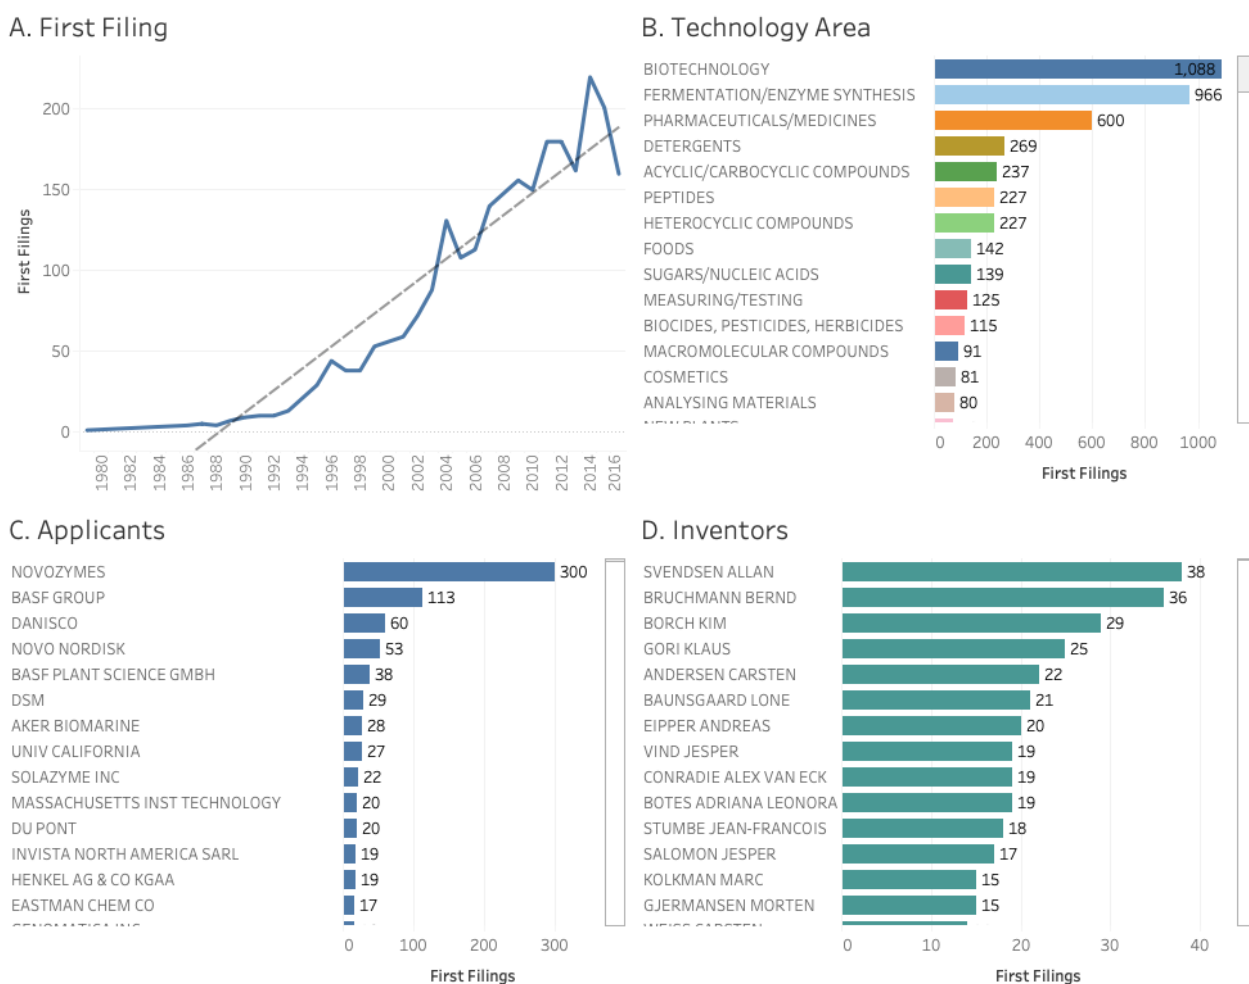

593

594 *Figure 7: Overview of Patent Activity involving Antarctic Organisms*

595 Figure 5A reveals a rising, if irregular trend in filings. The apparent decline in filings in  
 596 2016 will normally reflect a data lag time of at least two years between the filing of a patent  
 597 application and its publication. While a rising trend is observable from 2000 onwards the  
 598 overall number of filings, peaking at 220 in 2014, is relatively modest, particularly when

599 outstanding issues such as noise in the form of species recorded in the Antarctic that were  
600 not collected in the Antarctic are taken into consideration.

601 Figure 5B presents data on the main technology areas based on International Patent  
602 Classification subclasses and has been edited for readability. Figure 5B suggests that the  
603 Antarctic data is dominated by biotechnology with pharmaceutical or medical  
604 preparations, detergents, foods, biocides and cosmetics as the other main product  
605 categories.

606 In terms of the number of first filings the data is clearly led by Novozymes with other  
607 companies and research organisations some distance behind. Here we would observe that  
608 Novozymes has a long standing policy of including information on the geographic origin of  
609 genetic material in patent applications. On balance, the number of filings overall and by  
610 organisation is relatively small and subject to significant yearly variation.

611 In practice, the emerging patent landscape for Antarctica can be divided into six main  
612 segments: a) sequence data b) *Candida antarctica*, c) Antarctic krill, d) other species  
613 recorded in the Antarctic, e) citations of the Antarctic scientific literature, f) references to  
614 Antarctic place names as collection sites. We now address each of these in turn.

## 615 **Digital Sequence Information**

616 The prominence of biotechnology related activity is suggested by the number of Antarctic  
617 related filings containing DNA or amino acid sequences. Sequence data, under the place  
618 holder term 'digital sequence information' or DSI, has become an increasing focus of  
619 attention in international policy debates on access and benefit-sharing for genetic  
620 resources in recent years under the Convention on Biological Diversity and a range of other  
621 policy processes [149–154]. In the context of debates on a new treaty on marine  
622 biodiversity under the United Nations Law of the Sea, counts of genetic sequences in patent  
623 data have had a significant impact on policy debates and have attracted significant publicity  
624 [155–158].

625 In total 928 first filings contained a verifiable Antarctic species and DNA and amino acid  
626 sequence data. After the exclusion of records where the ubiquitous *E. coli* was the only  
627 species recorded in a document with a sequence listing, 739 first filings contained  
628 sequences.

629 In practice, considerable caution is required in interpreting the sequence data in patent  
630 documents. Existing research has adopted the novel approach of cumulating counts of  
631 sequences in patent documents that are linked to marine species in patent sequence data  
632 from the World Intellectual Property Organization (WIPO) [155–158]. This serves the  
633 purpose of demonstrating the increasing presence of sequences from marine organism in  
634 patent activity and links to wider questions about benefit-sharing. However, the use of  
635 cumulative counts may inadvertently disguise the reality that underlying patent filings,  
636 reflecting the outcomes of investments in research and development, may be much weaker  
637 and made up of spikes of individual documents containing large numbers of sequences  
638 [157]. Figure 8 displays three different approaches to counting sequence data.

### 1. Sequences (Antarctic species)

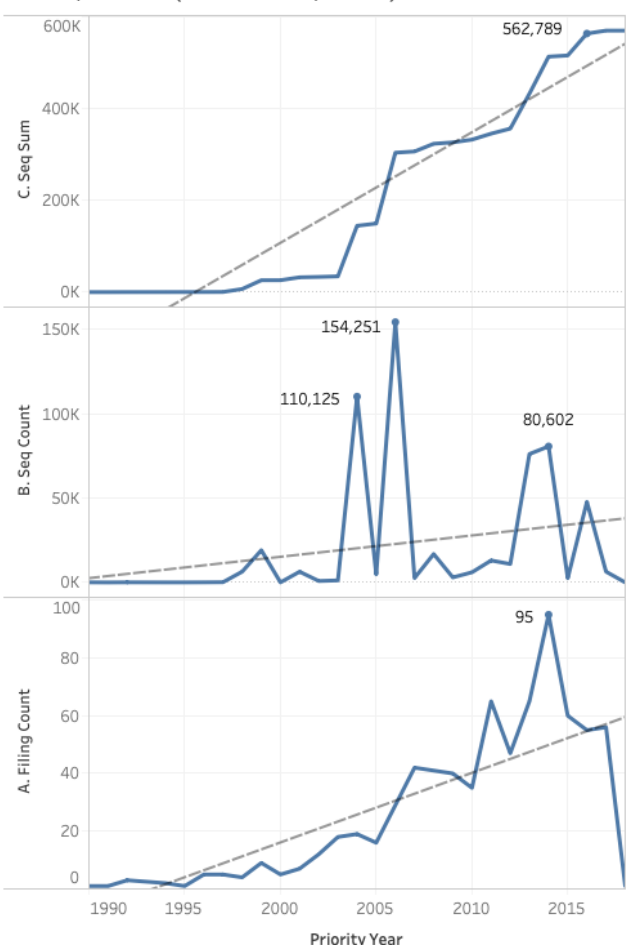

### 2. Antarctic Species in Titles, Abstracts or Claims

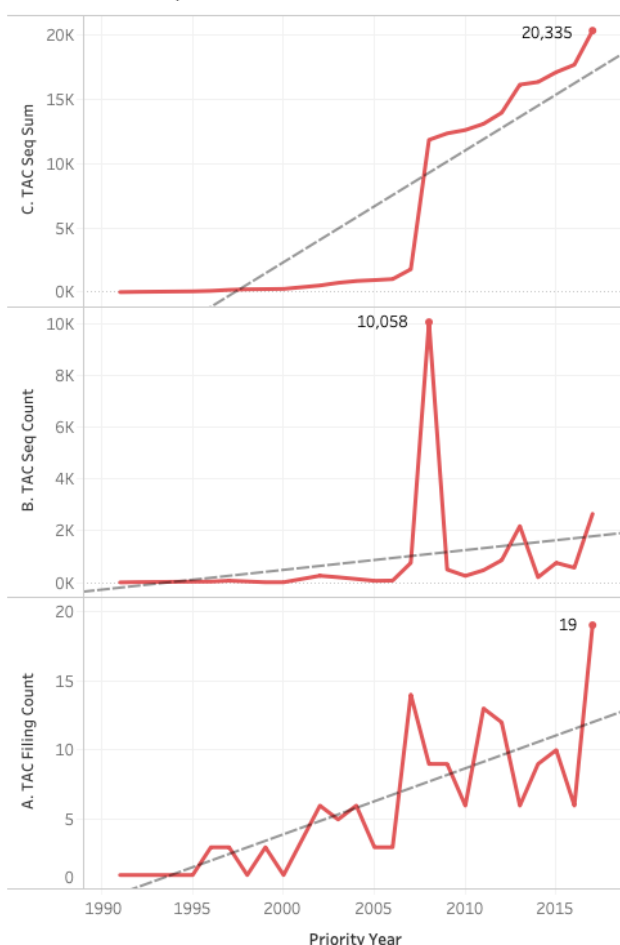

639

640 *Figure 8: Approaches to Sequence Counts for Patent Activity for Antarctic Species*

641 Beginning with Figure 8(1A) we observe overall trends in first filings containing sequences  
642 for documents that also contain an Antarctic species (after the exclusion of *E. coli*). Trends  
643 in filing are clearly modest over this period and peak at 95 filings in 2014. Moving up to  
644 Figure 8(1B) we present counts of the number of sequences that appeared in documents by  
645 year. This reveals clear spikes in activity that consist of a filing in 2004 containing 108,053  
646 sequences, a filing in 2006 containing 150,913 sequences and a set of 7 filings in 2015  
647 containing 78,771 of 80,602 sequences recorded that year. The significance of this becomes  
648 clearer when we consider Figure 8(1C) which displays the cumulative sum over time  
649 leading to a total of 562,789 sequences. This may readily give an impression of significant  
650 commercial interest until we recognise that 46% of activity over the period is made up of  
651 two filings rising to 60% of activity across the 9 filings mentioned above. In short,  
652 cumulative trends can radically amplify otherwise weak underlying activity.

653 It is common practice in patent analytics to focus on documents where a subject of interest  
654 appears in the titles, abstracts or claims on the basis that the document will in a  
655 fundamental way be 'about' that subject. Figure 8(2) reproduces the approach in Figure

656 8(1) but restricts the data, after the exclusion of *E. coli*, to filings where an Antarctic species  
657 appears in the titles, abstracts of claims (TAC) of a filing. As the irregularity of this pattern  
658 in Figure 8(2A), and the associated spike in Figure 8(2B), serve to highlight, when viewed  
659 from this perspective commercial interest in Antarctic species, as reflected in sequence  
660 data, can be reasonably be described as emergent rather than intense.

661 A need for caution in approaching sequence data in patent filings is also reflected in the fact  
662 that, as Jefferson et. al. 2013 have ably demonstrated, sequences may appear in patent data  
663 either because they are comparative reference sequences, or because they are claimed  
664 [159]. However, disentangling referenced and claimed sequences requires close  
665 interpretation of patent claims and represents a weak area in existing methods in patent  
666 analytics. Tools such as *PatSeq* from the Lens are opening up the possibility of greater  
667 rigour in the interpretation of sequence data in patent documents.

668 In our view, cumulative counts of sequences can serve as a useful indicator of growing  
669 commercial interest in biodiversity in areas such as the Antarctic but should not be used in  
670 isolation from conventional counts. Cumulative counts are particularly useful for  
671 amplifying an otherwise weak signal. However, the method should logically only be used in  
672 conjunction with other counts in order to avoid giving a misleading impression of intense  
673 commercial interest in genetic resources when in practice activity is weak or emergent.  
674 Furthermore, an exclusive focus on sequence data in the case of marine genetic resources  
675 has occurred at the expense of recognition that the majority of patent activity for  
676 biodiversity and marine biodiversity does not involve sequences [157,160]. Thus, in the  
677 case of the Antarctic data presented here the 928 filings containing sequences constitute  
678 34% of the 2,738 first filings containing an Antarctic species. As such, a broader view that  
679 accommodates the full spectrum of patent activity for biodiversity is appropriate.

680



681 **Candida antarctica**

682 As noted above, the type specimen for *Candida antarctica* (accepted name *Moesziomyces*  
 683 *antarcticus*) was originally collected from sediment in Lake Vanda. Figure 9 displays an  
 684 overview of filing activity for *Candida antarctica*.

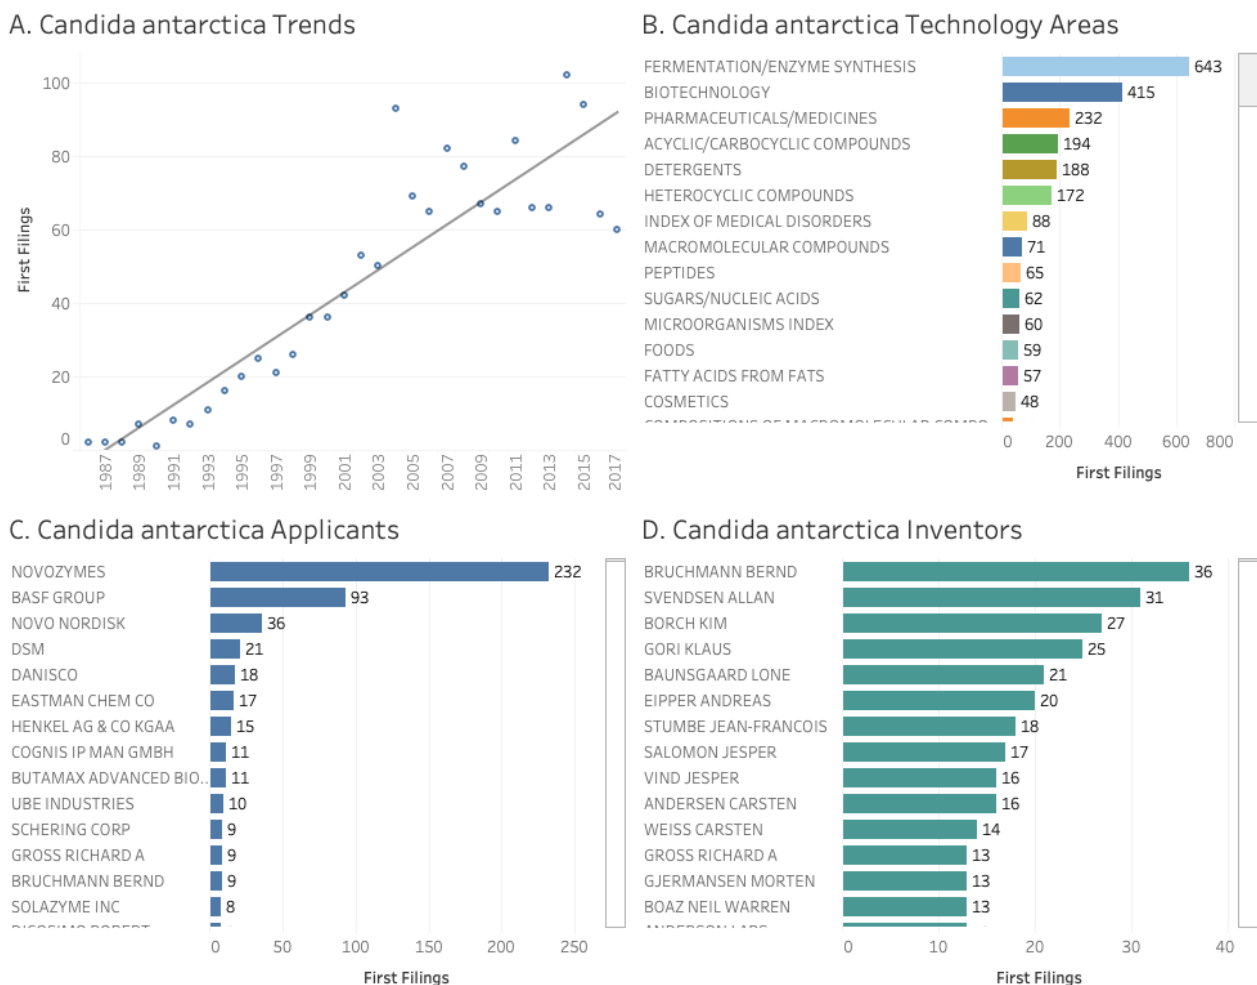

685

686 *Figure 9: Overview of First Filings for Candida antarctica*

687 *Candida antarctica* is a yeast species that is a source of industrially important lipases. A  
 688 lipase is any enzyme that catalyses the hydrolysis of fats. The earliest filing in the available  
 689 data for *C. antarctica* can be traced to 1986 by Novozymes for the Enzymatic Synthesis of  
 690 Waxes focusing on *Mucor miehei* and providing examples using *C. antarctica* linked to an  
 691 earlier filing in Denmark [161]. However, the most highly cited patent document is a 1992  
 692 filing by Novo Nordisk, the original parent of Novozymes, that claims *C. antarctica* lipase  
 693 and its variants including a number of modified amino acid sequences [162]. From these  
 694 relatively early beginnings the use of *Candida antarctica* lipase has expanded into a variety  
 695 of different sectors including medical, detergents, fuels and food stuffs for which we  
 696 provide brief examples.

697 As we can see in Figure 9B a significant number of medical related patent applications  
698 involve *C. antarctica*. These documents typically take the form of references to the actual or  
699 potential use of the lipase in medical compositions rather than claims to the lipase itself.  
700 Thus, Neose technologies Inc claim an invention that relates to mutants of Fibroblast  
701 Growth Factor (FGF), particularly FGF-20 and FGF-2 1, which contain newly introduced N-  
702 linked or O-linked glycosylation site(s). The application also discloses polynucleotide  
703 coding sequences for the mutants, expression cassettes comprising the coding sequences  
704 and cells expressing the mutants [163]. In a similar way, Rigel Pharmaceuticals Inc disclose  
705 2,4-pyrimidinediamine compounds having antiproliferative activity, compositions  
706 comprising the compounds and methods of using the compounds to inhibit cellular  
707 proliferation and to treat proliferate diseases such as tumorigenic cancers [164]. In our  
708 view the majority of medically focused references are likely to involve the actual or  
709 potential use of the lipase rather than direct claims involving *C. antarctica*. However, more  
710 direct use of the lipase is reflected in a University of Georgia Research Foundation Inc filing  
711 describing novel structured lipids and their use in modulating total cholesterol levels [165].

712 In the case of biodiesel, Wechtech Biotech Co. Ltd have applied for a method for enhancing  
713 the activity of an immobilized lipase they claim is useful in a method of preparing biodiesel  
714 by transesterification of triglycerides [166]. In the case of foodstuffs, Aker Biomarine  
715 report on novel compositions containing conjugated linoleic acids that are efficacious as  
716 animal feed additives and human dietary supplements that use *C. antarctica* lipase in the  
717 esterification process [167]. Senomyx Inc have reported that certain non-naturally  
718 occurring, non-peptide amide compounds and amide derivatives are useful flavour or taste  
719 modifiers for food, beverages, and other comestible or orally administered medicinal  
720 products or compositions [168]. However, the *C. antarctica* appears to be simply  
721 referenced in this application.

722 Patent activity for *C. antarctica* illustrates the point that species can be said to enjoy careers  
723 inside the patent system. These careers typically start with filings on the discovery of a  
724 useful property of an organism, are followed by claims to variants of that property and then  
725 expand to the actual or potential use of that element in a wider range of claimed inventions  
726 and products. As the uses of an element of an organism become established, research will  
727 also typically turn to identifying other useful properties of an organism and the increasing  
728 pursuit of alternatives from other sources to compete with those elements. Over time, the  
729 bulk of activity relates to the actual or potential use of the elements of an organism in a  
730 claimed invention rather than direct claims to elements of the organism. Experience  
731 suggests that the careers of many species in the patent system follow this type of pattern  
732 and this can also be observed in the case of Antarctic krill [160].

733

734 **Antarctic krill**

735 Antarctic krill *Euphausia superba* has become an increasing focus for the development of  
 736 commercial and consumer products involving krill oil and the use of krill in feed for  
 737 commercial aquaculture. Previous work by Foster et. al. 2011 highlighted the proliferation  
 738 of patent activity across sectors for krill and its implications for predicting trends in krill  
 739 fishery [169].

740 Across both scientific and common names for krill we identified 150 first filings linked to a  
 741 total of 1,193 family members worldwide. We would note that this data is confined to  
 742 filings that make reference to *Euphausia superba* or Antarctic krill within the Antarctic  
 743 patent dataset and does not consider wider references for the simple term krill in patent  
 744 documents (supplementary material). Figure 10 displays an overview of the data on first  
 745 filings for Antarctic krill.

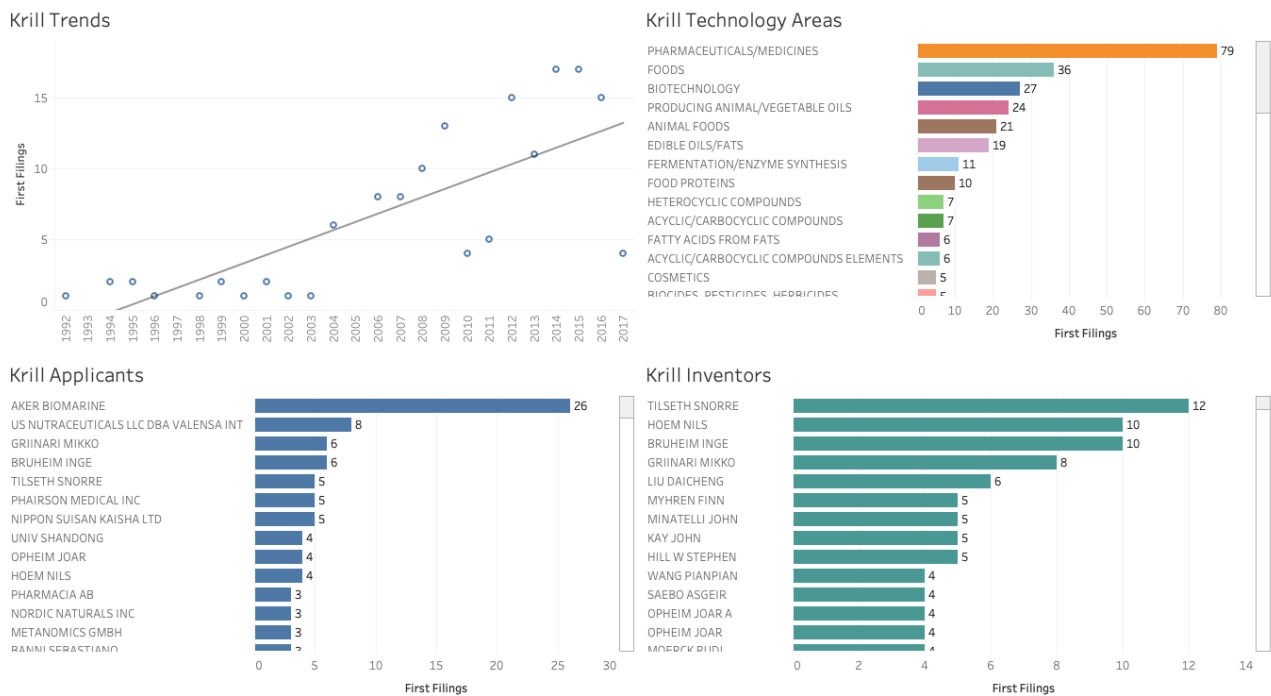

746

747

Figure 10: Antarctic krill

748 Figure 10 reveals that while first filings in relation to krill are relatively small, there is a  
 749 distinct rise in filings reflecting wider interest in commercial research and development  
 750 using krill. Figure 10 focuses on the very first filings of patent applications. In contrast,  
 751 Figure 11 expands the landscape to focus on all known follow on applications and grants  
 752 around the world that form 'family members' of the first filings.

### Family Members Map

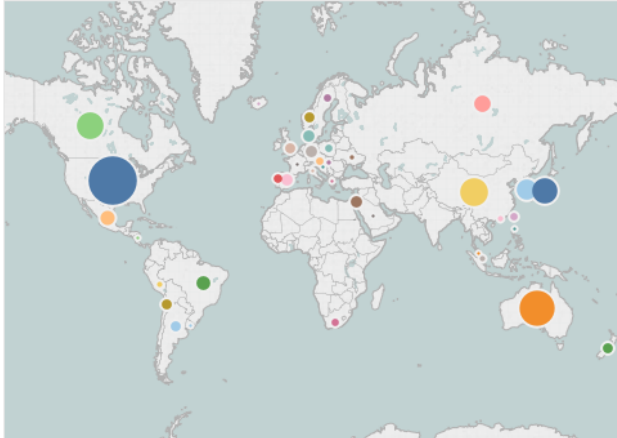

### Family Countries

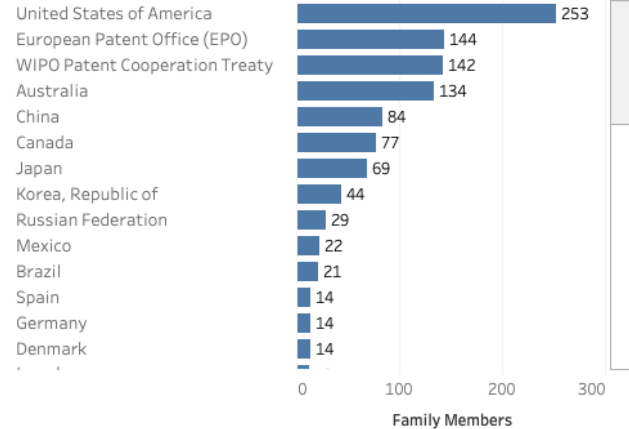

### Family Members Trends

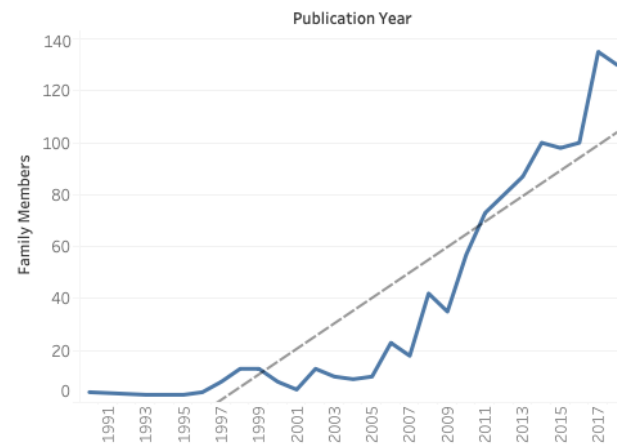

### Family Members Applicants

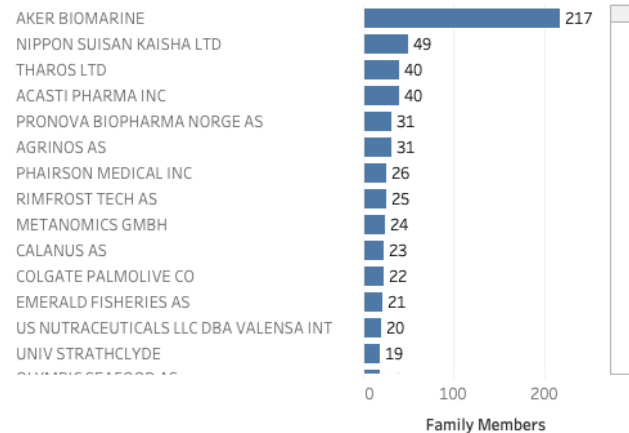

753

754

*Figure 11: Patent Family Members Worldwide for Antarctic Krill*

755 Comparison between Figure 10 and Figure 11 helps to clarify that a single application may  
 756 lead to multiple applications and grants around the world. Applicants must pay fees at each  
 757 stage of the application procedure and, where relevant, maintenance fees for patent grants  
 758 in each country. Follow on filings therefore reflect the importance of the claimed inventions  
 759 to the applicants in specific markets. This data also demonstrates that a relatively small  
 760 number of filings can have a wider global impact as applicants seek to protect and  
 761 commercialise their claimed inventions in multiple markets. However, while Figure 11  
 762 shows a steeply rising trend the numbers are not dramatic relative to activity in the wider  
 763 patent system.

764 In the case of Antarctic krill we are witnessing a combination of an increasing number of  
 765 claims to elements of krill, such as krill oil, and the use of krill as an actual or potential  
 766 ingredient in a claimed invention (such as a foodstuff, animal feed or cosmetic). In practice,  
 767 filings relating to Antarctic krill can be traced back to the 1980s and the scientific literature  
 768 on krill has played a significant role in promoting commercial research and development.  
 769 Thus, a 1986 article on ‘Supercritical carbon dioxide extraction of oils from antarctic krill’

770 by researchers from Japan has been cited in the patent literature over 55 times [170].  
771 Claimed inventions citing this article include the extraction of polar lipids and  
772 phospholipids from krill [171], and a new krill oil composition which was found to be  
773 useful as an anti-inflammatory, as an anti-oxidant and for improving insulin resistances  
774 and blood lipid profiles [172]. We also observe activity for a krill extract aimed at treating  
775 thrombosis [173] and a method for using krill oil to treat risk factors for cardiovascular,  
776 metabolic and inflammatory disorders [174] as well as therapeutic phospholipid  
777 compositions for treating or preventing a wide range of diseases such as cardiovascular  
778 and neurodegenerative diseases [175]. The use of krill as krill meal in aquaculture has also  
779 emerged as a significant focus of commercial research and development such as krill meal  
780 products [176], as well as methods for making krill meal [177] and using krill meal as a  
781 supplement [178,179]. Recent applications include applications seeking to tackle the  
782 harmful effects of oxidised LDL cholesterol [180], and to provide nutritional supplements  
783 [181] and new lipids [182].

#### 784 **Antarctic literature cited in patent documents**

785 The prominence of *Candida antarctica*, Antarctic krill and the sheer diversity of species that  
786 appear in patent documents that mention Antarctica can make it difficult to assess activity  
787 for other Antarctic species. However, the Lens database has pioneered efforts to link the  
788 scientific literature and citing patent documents. This means that it is possible to identify  
789 and explore cases where Antarctic research is cited in a patent document.

790 It is important to note that a scientific publication on Antarctic biodiversity may appear in a  
791 patent document for a number of reasons. In some countries, such as the United States,  
792 applicants are required to disclose all potentially relevant prior art (scientific publications  
793 and patents) at the time of application. This can take the form of passing references that are  
794 not in reality relevant to the claimed invention. In other cases, literature on Antarctica may  
795 form part of a wider thematic set (such as anti-freeze proteins) that indirectly informs the  
796 claimed invention. In a third case, an element of an Antarctic species identified in the  
797 literature may directly form part of a composition, method or process. Finally, in a small  
798 number of cases, Antarctic researchers are both publishing and applying for patent  
799 protection for biodiversity components arising from their research. We now briefly explore  
800 this data.

801 The article on Antarctic biodiversity that has received the most patent citations, with over  
802 60 citations, is a review entitled “Developments with Antarctic microorganisms: culture  
803 collections, bioactivity screening, taxonomy, PUFA production and cold-adapted enzymes”  
804 [183]. Patent applications citing this article have focussed on the production of  
805 polyunsaturated fatty acids (PUFAs) from bacterial microorganisms [184–187], including  
806 the production of the PUFA omega-3 [188]. A filing by Martek Biosciences on  
807 polyunsaturated fatty acid (PUFA) polyketide synthase (PKS) systems using *Shewanella*  
808 *japonica* and *Shewanella olleyana* also states that *S. olleyana* was sourced from the  
809 Australian Collection of Antarctic Microorganisms (ACAM) as strain number 644. However,  
810 the accompanying literature citation for the sample makes clear that the specific sample  
811 was from an estuary from Australia [189]. As such, while the Antarctic literature informs  
812 the claimed invention, this is an example of indirect influence.



813 An article on the Antarctic nematode, *Panagrolaimus davidi* that survives intracellular  
814 freezing has received 44 literature citations and is cited in 13 patent families [190]. The  
815 most highly cited patent families are from Zeltiq Aesthetics Inc and pertain to methods for  
816 cooling and treating subcutaneous lipid rich cells such as adipose tissue [191,192], and  
817 methods for interrupting or resuming treatments [193,194]. This is a second example  
818 where the Antarctic literature indirectly informs or inspires a claimed invention because  
819 the invention itself is a physical device for cooling tissue.

820 Patent claims involving biodiversity may be constructed on different taxonomic levels such  
821 as species, genus, family and order. In the case of order level claims, a 1974 article “Four  
822 new species of thraustochytrium from Antarctic regions...” [195] is referenced in 12 patent  
823 documents from 3 patent families filed by Martek Biosciences. However, the specific  
824 reference to Antarctica is limited to comparison with the growth conditions of other  
825 Thraustochytrium. Patent documents within the three families include a process for  
826 growing Thraustochytrium and a food product which includes Thraustochytrium [196] and  
827 processes for growing microorganisms of the order Thraustochytriales [197,198]. The first  
828 claim of one filing is for: “A process for culturing a microorganism of the order  
829 Thraustochytriales...” in a culture medium to obtain PUFA lipids. In this case it is *the*  
830 *process* for obtaining the lipids from the organisms that is the focus of the invention rather  
831 than biochemical compounds from the organisms *per se* as in claims for compositions of  
832 matter [196].

833 Examples of patent claims at the genus level are provided in a set of 18 patent applications  
834 citing an article defining the genus *Nocardiosis*, including *Nocardiosis antarctica*, [199].  
835 These patent documents include direct claims relating to *Nocardiosis*, such as a filings by  
836 Novozymes in relation to proteases and associated DNA and amino acid sequences, but use  
837 species other than *N. antarctica* such as *N. alba* [200]. However, these types of application  
838 commonly anticipate the use of the same, or substantially similar sequences, from other  
839 members of the genus through reference to other species, such as *N. antarctica* elsewhere  
840 in the application.

841 As these examples illustrate, patent documents involving biodiversity and the biodiversity  
842 literature may inform claimed inventions in a variety of ways and require considerable  
843 care in interpretation. We now turn to patent filings that cite the Antarctic literature where  
844 an Antarctic species is directly material to the claimed invention.

845 An article exploring exopolysaccharides produced by marine bacteria found in Arctic and  
846 Antarctic sea ice and other extreme environments has been cited in 10 patent families  
847 [201]. These include the use of exopolysaccharides in compositions to treat subterranean  
848 formations [202] while other filings refer to the use of bacterial exopolysaccharides in  
849 cosmetic compositions, with antioxidant properties [203], anti-wrinkle properties [204],  
850 and controlling sebum secretion in the skin [205].

851 An article identifying the mechanisms through which Antarctic microalga *Chlorella vulgaris*  
852 is able to adapt to cold conditions and high salinity [206] has been cited in 6 patent families  
853 (10 documents). These include the use of *Chlorella vulgaris* in the production of natural oil  
854 for the purpose of manufacturing transportation fuels such as renewable diesel, biodiesel,



855 and renewable jet fuel, as well as oleochemicals such as functional fluids, surfactants, soaps  
856 and lubricants [207]. This patent application has been cited by over 17 later filings.  
857 Another patent application utilising the species in the production of renewable fuels, which  
858 are also useful as feedstocks, also cites this article [208].

859 Research on alkaloids from the Antarctic sponge *Kirkpatrickia variolosa* in the mid 1990s  
860 has been cited in four patent families containing 10 documents led by the Spanish  
861 pharmaceutical and marine biodiscovery company Pharma Mar filed from 2000 onwards  
862 [209]. The patent families focus on the anti-tumour properties of Variolin and its  
863 derivatives [210–213]. Three of the patent families contain over 30 family members with  
864 protection sought in 21 countries suggesting that the applicants believe that the claimed  
865 invention has significant commercial potential.

866 As discussed above, cold tolerance or antifreeze molecules and proteins have been a  
867 significant area of research in the Antarctic. The Antarctic grass *Deschampsia antarctica* has  
868 been a significant focus of Antarctic research with 251 articles in our Antarctic literature  
869 dataset with top cited scientific literature focusing on issues such as heat tolerance of  
870 photosynthesis, the evolution of UV absorbing compounds, and vascular plants as  
871 bioindicators for warming in Antarctica [214–216].

872 Scientific literature that is cited by patent applicants includes work on three cold-  
873 responsive genes from *Deschampsia antarctica* by researchers from Chile [217]. This  
874 research is cited by three patent families including one for an ice recrystallisation  
875 inhibition protein, and another for an isolated low temperature plant promoter gene  
876 [218,219]. Other work of relevance includes work on the characterization of antifreeze  
877 activity in Antarctic plants [220] that is cited in a 2013 patent grant for an agent for  
878 cutaneous photoprotection against UVA (I and II) and UVB radiation (skin protection  
879 against sun damage) containing an aqueous extract from *Deschampsia antarctica* either  
880 obtained from its native environment or grown in artificial settings [221]. As this suggests,  
881 genetic elements and compounds from Antarctic species may find applications in multiple  
882 industry sectors. In total, as highlighted in Figure 5, we identified 26 first filings involving  
883 *Deschampsia antarctica*.

884 An article examining the antifreeze protein gene from the antarctic marine diatom  
885 *Chaetoceros neogracile* [222] is cited in a 2014 patent family filed by Samsung electronics  
886 for an “Antifreeze Member”. The focus of the claimed invention is the creation of a metal  
887 substrate for semiconductors, energy and biosensors that overcomes the problem of frost  
888 formation on cooling plates. A 2017 US patent grant to Samsung claims that this problem  
889 can be solved by “a recombinant antifreeze protein in which a metal-binding protein is  
890 conjugated to an antifreeze protein derived from *Chaetoceros neogracile*” [223].

891 In what appears to be a small number of cases the authors of scientific articles are also  
892 applying for patent protection. One example is work by researchers in Korea from the  
893 Korea Polar Research Institute and the Korea Ocean Research and Development Institute in  
894 work on the antioxidant properties of lichens from Antarctica, notably *Ramalina terebrata*  
895 [224]. In this case the research has led to the filing of 5 applications focusing on Ramalin  
896 from *Ramalina terebrata* [225,226]. This includes the use of Ramalin for its antioxidant

897 properties, in pharmaceutical products to treat oxidation related diseases, in functional  
898 foods for anti-aging purposes and in functional cosmetics for skin-whitening and anti-  
899 wrinkle purposes [227]. One patent application relates to the use of Ramalin in a  
900 pharmaceutical composition to treat or prevent inflammatory and immune diseases [228].  
901 Another application relates to anti-cancer treatment for colorectal cancer [229]. Taken  
902 together the filings suggest a strategy to capture a broad range of potential medical  
903 applications for Ramalin. At the time of writing the scientific landscape for Ramalin  
904 consists of 31 scientific publications and 21 patent families. This represents a significant  
905 research investment and strongly suggests that the applicants believe Ramalin has  
906 commercial potential.

907 Corals and tunicates, such as sea squirts, have been a major focus of applied and  
908 commercial marine research [230]. In the case of Antarctica *Synoicum adareanum* has been  
909 the subject of research on a cytotoxic macrolide that also formed the basis for a patent  
910 application and grant to the lead authors [231,232]. The sea squirt *Aplidium cyaneum* has  
911 also been a focus of research on cytotoxic bromoindole derivatives that became the basis of  
912 a patent application by some of the authors [233,234].

913 Antarctic fish have also become a significant focus of commercially oriented research and  
914 development. The scientific literature has focused on issues such as the role of  
915 Notothenioid fish in the food web of the Ross Sea shelf [235], or neutral buoyancy in  
916 Notothenioid [236]. Commercially oriented research for Notothenioids such as *Dissostichus*  
917 *mawsoni* focuses on antifreeze glycopeptides in the tissues and fluids of Antarctic fish [237]  
918 and comparative analysis of these proteins between Arctic and Antarctic fish [238]. This  
919 work has resulted in a direct filing in 1990 by at least one of the researchers at the  
920 University of California for thermal hysteresis proteins with a significant impact on later  
921 patent filings in the form of 57 patent citations focusing on issues such as ice-controlling  
922 molecules and cryosurgery [239]. In total 7 first filings relating to *Dissostichus mawsoni*  
923 were identified in the patent dataset.

924 Other Notothenioidei that are a focus of commercial research and development include the  
925 White Blooded Icefish (*Chaenocephalus aceratus*) [240,241]. Work on icefish lacking in  
926 haemoglobin is reflected in a 1999 filing on methods for the isolation of hemopoietic genes  
927 in Antarctic icefish [242]. Comparative research involving *Chaenocephalus aceratus*  
928 focusing on Vitamin E content [243] associated with cold adaptation has also attracted a  
929 patent citation but with a specific focus on a krill composition [244]. *Pagothenia*  
930 *borchgrevinki* is also a source for a patent filing by Airbus in 2008 for anti-freeze proteins  
931 for application to wings, rotors and turbines [160,245].

932 As these examples make clear, analysis of patent documents that cite the Antarctic  
933 literature provide a clear route to monitoring filings where an Antarctic species is material  
934 to a claimed invention. However, care is required in interpreting the reasons why an article  
935 is cited and whether an Antarctic species is directly involved or material to the claimed  
936 invention. We conclude this exploration of the patent landscape by briefly examining  
937 references to Antarctic place names in patent data.

## 938 **Antarctic Places**

939 One aim of the research was, as far as possible, to identify and map place names appearing  
940 in the literature and patent data. Two main sources of data are available for places in  
941 Antarctica. The first is the SCAR Composite Gazetteer (March 2018) of 36,630 names. The  
942 second source is the Geonames database, which produces a file AQ for Antarctica  
943 containing 18,526 place names and 27,273 variant names in multiple languages. To  
944 examine references to Antarctic places in patent documents we deduplicated the names  
945 and then mapped the roots of place names into the patent data focusing on patent  
946 documents that also contain a species name. In total we identified 267 filings that  
947 contained a reference to a place name and a species name, dominated by the term  
948 Antarctic/Antarctica. References range from general descriptions of krill as an Antarctic  
949 species to Antarctic islands. Here we focus on illustrative examples.

950 A 2010 filing by researchers from the Korea Ocean Research Development Institute  
951 (published as EP2617464A1) makes multiple references to places including King Sejon  
952 Station, Barton Peninsula and King George Island. The application focuses on Antarctic  
953 lichens notably an extract of *Stereocaulon alpinum* in pharmaceutical and food  
954 compositions to prevent or treat diabetes or obesity and has a patent family with 15  
955 members including patent grants in China, under the European Patent Convention, Japan  
956 and the United States [246]. The patent application and other members of the patent family  
957 explain that:

958 "...the Antarctic lichen *Stereocaulon alpinum* (*Stereocaulon alpinum* (Hedw.) G.L. Sm.) used in the present  
959 invention was collected from the area around the King Sejong Station (S 62°13.3', W58°47.0') located on Barton  
960 Peninsula on King George Island, Antarctica, in January 2003."

961 An important feature of this explicit reference is that it is possible to identify the precise  
962 point of collection through the use of a named place and coordinates. This is also a case  
963 where at least one of the authors of research on *Stereocaulon alpinum* is listed as an  
964 inventor [247].

965 A second example of direct collection of samples in Antarctica also reveals the close  
966 relationship between the publication of scientific articles and patent filings. A 2016 filing  
967 from researchers from the University of South Florida and the University of Alabama (UAB)  
968 Research Foundation addresses MRSA Biofilm Inhibition [248]. The application states that:

969 "In the course of acquiring biodiversity to support an antibiotic screening program, the current inventors obtained  
970 the sponge *Dendrilla membranosa* from the vicinity of Palmer Station, Antarctica. The dichlorom ethane extract of  
971 the freeze-dried sponge was subjected to reversed-phase solid-phase extraction eluted with acetonitrile. The  
972 extract underwent HPLC purification to yield four major natural products, including three previously reported  
973 spongian diterpenes: aplysulphurin, tetrahydroaplysulphurin, and membranolide (Karuso et al., Aust. J. Chem.  
974 1984, 37, 1081-1093; Karuso et al., Aust. J. Chem. 1986, 39, 1643-1653; and Molinski et al., J. Org. Chem. 1989, 54,  
975 3902-3907). The fourth product was identified as darwinolide, a new rearranged spongian diterpene having a  
976 structure shown in FIG. 1. ... The darwinolide skeleton is the newest of over a dozen structural motifs distinguishing  
977 the broad chemodiversity found in the Darwinellidae family of sponges." [248]

978

979 They go on to explain that:

980 “Sponge samples were collected from various sites around Palmer Station, Antarctica in the austral summer of  
981 2011. The collection sites chosen were Norsel Point (64°45.674’ S, 64°05.467’W), Bonaparte Point (64°46.748’ S,  
982 64°02.542’W), Gamage Point (64°46.345’ S 64°02.915’W), and Laggard Island (64°48.568’ S, 64 00.984’W) at  
983 depths between 5-35 m below sea level. Samples were frozen and transported back to the University of South  
984 Florida at -70°C where tissues were lyophilized and stored at - 80°C until further processing.”

985 The applicants claim a method for treating bacterial infections including MRSA biofilms  
986 with a darwinolide compound. However, this is also a case where researchers time the  
987 submission of a scientific article and a patent filing in such a way that the research article,  
988 which would become prior art, does not destroy the novelty of the claimed invention. Thus,  
989 the earliest filing date of the patent application is in April 2016 shortly before the  
990 publication of the scientific article in May 2016 and is followed in October 2017 by  
991 publication of the Patent Cooperation Treaty patent application [249].

992 A third example highlights that applicants may obtain samples through Antarctic research  
993 centres operating as intermediaries. A 2009 first filing from India became the basis for a  
994 2010 international Patent Cooperation Treaty application [250] for methods of preparing a  
995 plant extract using liquid chromatography and mass spectrometry where the plant extract  
996 is from *Deschampsia antarctica*. This application describes how:

997 “The frozen plant material was procured from Coppermine Peninsula on Robert Island, South Shetland Island,  
998 Antarctica and was exported to us by Instituto Antartico Chileno...”

999 This application also makes extensive reference to the wider literature on *D. antarctica* that  
1000 mention places such as Signy Island and King George Island signifying that the intensity of  
1001 occurrences of references to Antarctic places may be a good indicator of collection of  
1002 samples in the Antarctic. However, the main insight from this example is that in some cases  
1003 an Antarctic research institute may serve as an intermediary providing Antarctic material  
1004 for commercially oriented research. It is unclear whether the institute was aware of this  
1005 purpose when providing the material or whether a material transfer agreement (MTA) was  
1006 established between the institute and the applicants.

1007 A fourth example illustrates the point raised above that a sample may come from multiple  
1008 sources. A 2006 filing by the Monterey Bay Aquarium Research Institute for “A light-driven  
1009 energy generation system using proteorhodopsin” explains that:

1010 Using the same proteorhodopsin-specific PCR primers, as for instance shown in FIGS. 2 and 3, proteorhodopsin  
1011 genes were also amplified from bacterioplankton extracts. As mentioned above, any proteorhodopsin-specific PCR  
1012 primer can be used. These bacterioplankton extracts include those from the Monterey Bay (referred to as MB  
1013 clones), the Southern Ocean (Palmer Station, referred to as PAL clones), and waters of the central North Pacific  
1014 Ocean (Hawaii Ocean Time series station, referred to as HOT clones).

1015 A similar multi-source case is provided by a filing from Woods Hole Oceanographic  
1016 Institute for metagenomic samples collected by drilling through sea ice in the Ross Sea  
1017 combined with analysis of other diatoms to create a recombinant organism for the  
1018 expression of Cobalamin (vitamin B12) [251]. An additional example is a filing for a  
1019 cryoprotective agent from a novel *Pseudoalteromonas sp.* strain CY 01 (KCTC 12867BP)  
1020 collected from the Antarctic Ocean as well as Arctic strains [252]. While these applications

1021 explicitly involve samples from the Antarctic, it can be challenging to determine whether  
1022 the organisms are material to (part of) the claimed invention.

1023 References to Antarctic place names occur in the context of wider international debates on  
1024 disclosure of the origin of genetic material in patent applications and the consequences of  
1025 such disclosure [253]. Increasingly, countries that are party to the Convention on Biological  
1026 Diversity and its Nagoya Protocol are requiring disclosure of origin in support of the  
1027 implementation of these agreements. However, the consequences of disclosure, and failure  
1028 to disclose, may vary considerably. The present research reveals that applicants will often  
1029 mention Antarctic origin and may, as we have just seen, be explicit about the places and  
1030 coordinates of collection. In international policy debates at WIPO, agreement on  
1031 international requirements for disclosure of origin has become stuck on disagreements  
1032 about the consequences of disclosure, such as revocation of a granted patent in the absence  
1033 of evidence of prior informed consent and a benefit-sharing agreement with the country of  
1034 origin [253,254]. However, in the case of the Antarctic, as for marine biodiversity in Areas  
1035 Beyond National Jurisdiction, the function of disclosure could perhaps better be seen as  
1036 making the contribution of Antarctic biodiversity to innovation (as partly reflected in the  
1037 patent system) visible to the wider world [157,160]. That is, disclosure can assist with  
1038 supporting greater awareness of the ecosystem services provided by Antarctic biodiversity  
1039 and thus of Antarctica to wider human welfare. However, debates on disclosure of origin  
1040 also raise harder questions about the contribution that those who seek to commercially  
1041 develop and use Antarctic biodiversity should make to its conservation. We turn to how  
1042 this issue might be addressed in closing.

## 1043 **Conclusion**

1044 This paper has sought to contribute to mapping the scientific and patent landscape for  
1045 biodiversity and innovation in Antarctica and the Southern Ocean. The growing availability  
1046 of open access databases of scientific, patent and taxonomic data means that it is possible  
1047 to begin to map these landscapes at scale using methods that are open, transparent and  
1048 accessible to a range of disciplines. However, as we have also sought to demonstrate,  
1049 exploiting opportunities for analysis at scale reveals issues around data completeness and  
1050 data quality. In the case of patent data, these challenges extend to requirements for  
1051 considerable care in interpretation of the Antarctic origin of genetic resources within  
1052 patent documents and whether they are actually material to or part of the claimed  
1053 invention.

1054 Issues around data completeness and data quality can be addressed through approaches  
1055 such as re-indexing to address gaps, in the case of Microsoft Academic Graph, and closer  
1056 attention to data cleaning using locality information for taxonomic data from GBIF. The  
1057 growing availability of the full texts of both scientific and patent publications presents  
1058 important opportunities to improve access to the full results of scientific research but also  
1059 presents challenges in moving beyond pure metadata based approaches. Open access  
1060 databases such as the Lens have made important breakthroughs by linking together  
1061 scientific and patent data through citations. This in turn makes it easier to monitor patent  
1062 activity arising from research involving Antarctic biodiversity. Developments in machine  
1063 learning, in the form of Natural Language Processing libraries such as spaCy, mean that it is



1064 now possible to imagine a pipeline approach to monitoring Antarctic research by streaming  
1065 new scientific publications and patent data from database application programming  
1066 interfaces (APIs), such as the Lens, through a machine learning model for classification,  
1067 name entity recognition, analysis and distribution to the scientific and policy community.  
1068 The growing popularity of pipeline approaches to dealing with data at scale reflects the  
1069 widespread availability of open source libraries for analytics at scale. Implementing such a  
1070 pipeline would require focused investment by one or more members of the Antarctic  
1071 Treaty System and would logically be coordinated with the SCAR. As this paper helps to  
1072 demonstrate, this is an achievable goal.

1073 The present research also points to potential ways forward in addressing harder questions  
1074 around benefit-sharing from commercial research and development involving Antarctic  
1075 biodiversity. Bioprospecting has been on the agenda of the Antarctic Treaty System for a  
1076 number of years. However, as far as we are aware, beyond agreement to keep discussing  
1077 the issue, no consensus has emerged on a need for practical action other than collecting  
1078 more information to inform deliberations. This has a certain logic in light of uncertainties  
1079 about levels of activity and the actual or potential overlap between genetic resources inside  
1080 the Antarctic Treaty System, those within national jurisdictions and those being considered  
1081 by debates on the new treaty on marine biodiversity in areas beyond national jurisdiction  
1082 under the Law of the Sea.

1083 One challenge with the treatment of bioprospecting, or commercial research and  
1084 development as we prefer, is that it is largely seen in isolation from other activities in  
1085 Antarctica. A way forward could potentially be found by viewing commercial research and  
1086 development from an ecosystem services and natural capital accounting perspective. Many,  
1087 if not all members of the ATS, have embraced the ecosystem services approach and a  
1088 growing number are moving towards testing or implementing natural capital accounting in  
1089 accordance with the framework of the System of Environmental Economic Accounting  
1090 (SEEA) linked to the United Nations Systems of National Accounts (SEA) [19,20,255,256].  
1091 These developments have been accompanied by the increasing promotion of the concept of  
1092 Payments for Ecosystem Services (PES) within the environmental economics literature and  
1093 policy, as proposed by Verbitsky 2018 for tourism in Antarctica [19,257]. This type of  
1094 approach would allow countries to draw on existing experience with ecosystem services  
1095 and natural capital accounting when addressing commercial activity in the Antarctic. It  
1096 should be emphasised that the valuation of ecosystem services is challenging and it is  
1097 increasingly recognised that there is a risk that such approaches may seek to reduce  
1098 biodiversity to an equivalent monetary value at the expense of recognition of the multiple  
1099 values of biodiversity and its services. Nevertheless, despite these reservations, over the  
1100 short and medium term this approach would place the assessment of activities such as  
1101 commercial research and development or tourism within a clear and transparent  
1102 framework that would bring Antarctica into the fold of wider work on the economics of  
1103 biodiversity.

1104 The year 2020 has been described as a super year for biodiversity. As countries scramble to  
1105 address the formidable damage caused by Covid-19 it remains to be seen whether this will  
1106 become a reality. However, one important lesson from the environmental and ecological  
1107 economics literature is that biodiversity cannot be treated as a free good. The joint



1108 biodiversity and climate crisis has its origins in the treatment of the environment as a free  
1109 good when in fact the costs are deferred elsewhere including to future generations. When  
1110 viewed from this perspective, biodiversity is not free but has to be paid for. At present, as  
1111 far as we are aware, the revenue generated by biodiversity based innovation from research  
1112 in the Antarctic does not contribute to the conservation of biodiversity in the Antarctic.  
1113 2020 provides an opportunity to rethink the logic that produces this situation by  
1114 recognising that biodiversity must be paid for. By accepting that biodiversity is not free we  
1115 are then able to ask other questions focusing on returning tangible benefits to Antarctic  
1116 biodiversity such as: how much, by whom, in what form, and to what ends? This paper  
1117 seeks to contribute to the development of the evidence base for addressing these questions.

## 1118 **References**

1119

- 1120 1. Convey P, Peck LS. Antarctic environmental change and biological responses. *Science Advances*. 2019;5:  
1121 eaz0888–null. doi:10.1126/sciadv.aaz0888
- 1122 2. Shaw JD, Terauds A, Riddle MJ, Possingham HP, Chown SL. Antarctica’s protected areas are inadequate,  
1123 unrepresentative, and at risk. *PLOS Biology*. 2014;12: e1001888–null. doi:10.1371/journal.pbio.1001888
- 1124 3. Chown SL, Brooks CM, Terauds A, Bohec CL, Klaveren-Impagliazzo C van, Whittington JD, et al. Antarctica  
1125 and the strategic plan for biodiversity. *PLOS Biology*. 2017;15: 2001656–null.  
1126 doi:10.1371/journal.pbio.2001656
- 1127 4. Abrams PA, Ainley DG, Blight LK, Dayton PK, Eastman JT, Jacquet J. Necessary elements of precautionary  
1128 management: Implications for the antarctic toothfish. *Fish and Fisheries*. 2016;17: 1152–1174.  
1129 doi:10.1111/faf.12162
- 1130 5. Senior K. Bioprospecting in antarctica. *Frontiers in Ecology and the Environment*. 2004;2: 60–null.  
1131 doi:10.2307/3868198
- 1132 6. Lohan D, Johnston S. Bioprospecting in antarctica [Internet]. 2005. Available:  
1133 [http://collections.unu.edu/eserv/UNU:3100/antarctic\\_bioprospecting\\_3.pdf](http://collections.unu.edu/eserv/UNU:3100/antarctic_bioprospecting_3.pdf); <https://lens.org/024-748-883-732-249>
- 1135 7. Tvedt MW. Patent law and bioprospecting in antarctica. *Polar Record*. 2011;47: 46–55. Available:  
1136 [http://www.journals.cambridge.org/abstract\\_S0032247410000045](http://www.journals.cambridge.org/abstract_S0032247410000045);  
1137 <https://www.cambridge.org/core/journals/polar-record/article/patent-law-and-bioprospecting-in-antarctica/F285A818D5A18E745E70CD4AD63340E2>; <https://lens.org/064-456-376-454-017>
- 1139 8. Liu K, Ding H, Yu Y, Chen B. A cold-adapted chitinase-producing bacterium from antarctica and its potential  
1140 in biocontrol of plant pathogenic fungi. *Marine Drugs*. 2019;17: 695–null. doi:10.3390/md17120695
- 1141 9. Ogaki MB, Costa Coelho L da, Vieira R, Neto AA, Zani CL, Alves TMA, et al. Cultivable fungi present in deep-  
1142 sea sediments of antarctica: Taxonomy, diversity, and bioprospecting of bioactive compounds. *Extremophiles*.  
1143 2019; 1–12. doi:10.1007/s00792-019-01148-x
- 1144 10. Núñez-Montero K, Barrientos L. Advances in antarctic research for antimicrobial discovery: A  
1145 comprehensive narrative review of bacteria from antarctic environments as potential sources of novel  
1146 antibiotic compounds against human pathogens and microorganisms of industrial importance. *The Journal of*  
1147 *Antibiotics*. 2018;7: 90–null. doi:10.3390/antibiotics7040090

- 1148 11. Hug SE, Brändle MP. The coverage of microsoft academic: Analyzing the publication output of a university.  
1149 Scientometrics. Springer Nature; 2017;113: 1551–1571. doi:10.1007/s11192-017-2535-3
- 1150 12. Hug SE, Ochsner M, Brändle MP. Citation analysis with microsoft academic. Scientometrics. Springer  
1151 Nature; 2017;111: 371–378. doi:10.1007/s11192-017-2247-8
- 1152 13. Thelwall M. Can microsoft academic be used for citation analysis of preprint archives? The case of the  
1153 social science research network. Scientometrics. Springer Nature; 2018;115: 913–928. doi:10.1007/s11192-  
1154 018-2704-z
- 1155 14. Thelwall M. Does microsoft academic find early citations? Scientometrics. Springer Nature; 2017;114:  
1156 325–334. doi:10.1007/s11192-017-2558-9
- 1157 15. Thelwall M. Microsoft academic: A multidisciplinary comparison of citation counts with scopus and  
1158 mendeley for 29 journals. Journal of Informetrics. Elsevier BV; 2017;11: 1201–1212.  
1159 doi:10.1016/j.joi.2017.10.006
- 1160 16. Harzing A-W. Two new kids on the block: How do crossref and dimensions compare with google scholar,  
1161 microsoft academic, scopus and the web of science? Scientometrics. Springer Science; Business Media LLC;  
1162 2019; doi:10.1007/s11192-019-03114-y
- 1163 17. MA. Millenium ecosystem assessment: Ecosystems and human well-being. 2003.
- 1164 18. Neumann B, Mikoleit A, Bowman JS, Ducklow HW, Müller F. Ecosystem service supply in the antarctic  
1165 peninsula region: Evaluating an expert-based assessment approach and a novel seascape data model.  
1166 Frontiers in Environmental Science. 2019;7: null–null. doi:10.3389/fenvs.2019.00157
- 1167 19. Verbitsky J. Ecosystem services and antarctica: The time has come? Ecosystem services. 2018;29: 381–  
1168 394. doi:10.1016/j.ecoser.2017.10.015
- 1169 20. Hein L, Bagstad KJ, Obst C, Edens B, Schenau S, Castillo G, et al. Progress in natural capital accounting for  
1170 ecosystems. Science. 2020;367: 514–515. doi:10.1126/science.aaz8901
- 1171 21. Sinha A, Shen Z, Song Y, Ma H, Eide D, Hsu B-J (Paul), et al. An overview of microsoft academic service  
1172 (MAS) and applications. Proceedings of the 24th international conference on world wide web - WWW 15  
1173 companion. ACM Press; 2015. doi:10.1145/2740908.2742839
- 1174 22. R Core Team. R: A language and environment for statistical computing [Internet]. Vienna, Austria: R  
1175 Foundation for Statistical Computing; 2018. Available: <https://www.R-project.org/>
- 1176 23. Luraschi J, Kuo K, Ushey K, Allaire J, The Apache Software Foundation. Sparklyr: R interface to apache  
1177 spark [Internet]. 2019. Available: <https://CRAN.R-project.org/package=sparklyr>
- 1178 24. Wickham H. Tidyverse: Easily install and load the 'tidyverse' [Internet]. 2017. Available: [https://CRAN.R-  
1179 project.org/package=tidyverse](https://CRAN.R-project.org/package=tidyverse)
- 1180 25. Benoit K, Matsuo A. Spacyr: Wrapper to the 'spaCy' 'nlp' library [Internet]. 2019. Available:  
1181 <https://spacyr.quanteda.io>
- 1182 26. Robinson D, Silge J. Tidytext: Text mining using 'dplyr', 'ggplot2', and other tidy tools [Internet]. 2018.  
1183 Available: <https://CRAN.R-project.org/package=tidytext>
- 1184 27. Patterson D, Cooper J, Kirk P, Pyle R, Remsen D. Names are key to the big new biology. Trends in Ecology  
1185 & Evolution. Elsevier BV; 2010;25: 686–691. doi:10.1016/j.tree.2010.09.004
- 1186 28. Döring M. Families of living organisms (falo) [Internet]. GBIF Secretariat; 2015. doi:10.15468/tfp6yv

- 1187 29. Ruggiero MA, Gordon DP, Orrell TM, Bailly N, Bourgoin T, Brusca RC, et al. A higher level classification of  
1188 all living organisms. Thuesen EV, editor. PLOS ONE. Public Library of Science (PLoS); 2015;10: e0119248.  
1189 doi:10.1371/journal.pone.0119248
- 1190 30. Chamberlain S, Szoecs E, Foster Z, Arendsee Z. Taxize: Taxonomic information from around the web  
1191 [Internet]. 2018. Available: <https://CRAN.R-project.org/package=taxize>
- 1192 31. Gbif.Org O. GBIF occurrence download antarctica (aq) [Internet]. The Global Biodiversity Information  
1193 Facility; 2019. doi:10.15468/dl.atwzzy
- 1194 32. Gbif.Org O. GBIF occurrence download, polygon((-180 -90,180 -90,180 -60,-180 -60,-180 -90)), with  
1195 coordinates, no geospatial issue [Internet]. The Global Biodiversity Information Facility; 2019.  
1196 doi:10.15468/dl.im0nrh
- 1197 33. Zizka A. CoordinateCleaner: Automated cleaning of occurrence records from biological collections  
1198 [Internet]. 2019. Available: <https://CRAN.R-project.org/package=CoordinateCleaner>
- 1199 34. Shen Z, Ma H, Wang K. A web-scale system for scientific knowledge exploration. CoRR.  
1200 2018;abs/1805.12216. Available: <http://arxiv.org/abs/1805.12216>
- 1201 35. Cárdenas P, Lange CB, Vernet M, Esper O, Srain B, Vorrath M-E, et al. Biogeochemical proxies and diatoms  
1202 in surface sediments across the drake passage reflect oceanic domains and frontal systems in the region.  
1203 Progress in Oceanography. 2019;174: 72–88. doi:10.1016/j.pocean.2018.10.004
- 1204 36. Chu W-L, Dang N-L, Kok Y-Y, Yap K-SI, Phang S-M, Convey P. Heavy metal pollution in antarctica and its  
1205 potential impacts on algae. Polar Science. 2019;20: 75–83. doi:10.1016/j.polar.2018.10.004
- 1206 37. Gersonde R, Kyte FT, Bleil U, Diekmann B, Flores J-A, Gohl K, et al. Geological record and reconstruction of  
1207 the late pliocene impact of the eltanin asteroid in the southern ocean. Nature. 1997;390: 357–363.  
1208 doi:10.1038/37044
- 1209 38. Eagles G, Gohl K, Larter RD. High-resolution animated tectonic reconstruction of the south pacific and  
1210 west antarctic margin. Geochemistry Geophysics Geosystems. 2004;5: null–null. doi:10.1029/2003gc000657
- 1211 39. Michels K, Kuhn G, Hillenbrand C-D, Diekmann B, Fütterer DK, Grobe H, et al. The southern weddell sea:  
1212 Combined contourite-turbidite sedimentation at the southeastern margin of the weddell gyre. Geological  
1213 Society, London, Memoirs. 2002;22: 305–323. doi:10.1144/gsl.mem.2002.022.01.22
- 1214 40. Jokat W, Uenzelmann-Neben G, Kristoffersen Y, Rasmussen TM. Lomonosov ridge : A double-sided  
1215 continental margin. Geology. 1992;20: 887–890. doi:10.1130/0091-7613(1992)020<0887:lradsco>2.3.co;2
- 1216 41. Rogers AD, Tyler PA, Connelly DP, Copley JT, James RH, Larter RD, et al. The discovery of new deep-sea  
1217 hydrothermal vent communities in the southern ocean and implications for biogeography. PLOS Biology.  
1218 2012;10: e1001234–null. doi:10.1371/journal.pbio.1001234
- 1219 42. Brandt A, Gooday AJ, Brandão SN, Brix S, Brökeland W, Cedhagen T, et al. First insights into the  
1220 biodiversity and biogeography of the southern ocean deep sea. Nature. 2007;447: 307–311.  
1221 doi:10.1038/nature05827
- 1222 43. Augustin L, Barbante C, Barnes PRF, Barnola JM, Bigler M, Castellano E, et al. Eight glacial cycles from an  
1223 antarctic ice core. Nature. 2004;429: 623–628. doi:10.1038/nature02599
- 1224 44. Claudet J, Bopp L, Cheung WWL, Devillers R, Escobar-Briones E, Haugan PM, et al. A roadmap for using the  
1225 un decade of ocean science for sustainable development in support of science, policy, and action. One Earth.  
1226 2020;2: 34–42. doi:10.1016/j.oneear.2019.10.012

- 1227 45. Ji Q, Pang X, Zhao X. A bibliometric analysis of research on antarctica during 1993-2012. *Scientometrics*.  
1228 Springer Nature; 2014;101: 1925–1939. doi:10.1007/s11192-014-1332-5
- 1229 46. Fu H-Z, Ho Y-S. Highly cited antarctic articles using science citation index expanded: A bibliometric  
1230 analysis. *Scientometrics*. Springer Nature; 2016;109: 337–357. doi:10.1007/s11192-016-1992-4
- 1231 47. Kim H, Jung W-S. Bibliometric analysis of collaboration network and the role of research station in  
1232 antarctic science. *Industrial Engineering and Management Systems*. Korean Institute of Industrial Engineers;  
1233 2016;15: 92–98. doi:10.7232/iems.2016.15.1.092
- 1234 48. Liang Q, Peng S, Niu B, Zhou C, Wang Z. Mapping glacier-related research in polar regions: A bibliometric  
1235 analysis of research output from 1987 to 2016. *Polar Research*. Norwegian Polar Institute; 2018;37: 1468196.  
1236 doi:10.1080/17518369.2018.1468196
- 1237 49. Hijmans RJ, Cameron SE, Parra JL, Jones PG, Jarvis A. Very high resolution interpolated climate surfaces for  
1238 global land areas. *International Journal of Climatology*. Wiley; 2005;25: 1965–1978. doi:10.1002/joc.1276
- 1239 50. Zuur AF, Ieno EN, Walker N, Saveliev AA, Smith GM. Mixed effects models and extensions in ecology with r  
1240 [Internet]. Springer New York; 2009. doi:10.1007/978-0-387-87458-6
- 1241 51. Rayner NA. Global analyses of sea surface temperature, sea ice, and night marine air temperature since  
1242 the late nineteenth century. *Journal of Geophysical Research*. American Geophysical Union (AGU); 2003;108.  
1243 doi:10.1029/2002jd002670
- 1244 52. Petit JR, Jouzel J, Raynaud D, Barkov NI, Barnola J-M, Basile I, et al. Climate and atmospheric history of the  
1245 past 420,000 years from the vostok ice core, antarctica. *Nature*. Springer Nature; 1999;399: 429–436.  
1246 doi:10.1038/20859
- 1247 53. Lozupone C, Knight R. UniFrac: A new phylogenetic method for comparing microbial communities.  
1248 *Applied and Environmental Microbiology*. American Society for Microbiology; 2005;71: 8228–8235.  
1249 doi:10.1128/aem.71.12.8228-8235.2005
- 1250 54. Sherman E, Moore JK, Primeau F, Tanouye D. Temperature influence on phytoplankton community  
1251 growth rates. *Global Biogeochemical Cycles*. American Geophysical Union (AGU); 2016;30: 550–559.  
1252 doi:10.1002/2015gb005272
- 1253 55. Volkman JK. A review of sterol markers for marine and terrigenous organic matter. *Organic Geochemistry*.  
1254 Elsevier BV; 1986;9: 83–99. doi:10.1016/0146-6380(86)90089-6
- 1255 56. Rainey Fa, Ward-Rainey N, Kroppenstedt Rm, Stackebrandt E. The genus nocardiosis represents a  
1256 phylogenetically coherent taxon and a distinct actinomycete lineage: Proposal of nocardiosaceae fam. Nov.  
1257 *International Journal of Systematic Bacteriology*. Microbiology Society; 1996;46: 1088–1092.  
1258 doi:10.1099/00207713-46-4-1088
- 1259 57. Dalsgaard J, John MS, Kattner G, Müller-Navarra D, Hagen W. Fatty acid trophic markers in the pelagic  
1260 marine environment. *Advances in marine biology*. Elsevier; 2003. pp. 225–340. doi:10.1016/s0065-  
1261 2881(03)46005-7
- 1262 58. Fricke H, Gercken G, Schreiber W, Oehlenschläger J. Lipid, sterol and fatty acid composition of antarctic  
1263 krill (*euphausia superba* dana). *Lipids*. Wiley; 1984;19: 821–827. doi:10.1007/bf02534510
- 1264 59. Chen Y-C, Tou J, Jaczynski J. Amino acid and mineral composition of protein and other components and  
1265 their recovery yields from whole antarctic krill (*euphausia superba*) using isoelectric  
1266 solubilization/precipitation. *Journal of Food Science*. Wiley; 2009;74: H31–H39. doi:10.1111/j.1750-  
1267 3841.2008.01026.x

- 1268 60. Gigliotti JC, Davenport MP, Beamer SK, Tou JC, Jaczynski J. Extraction and characterisation of lipids from  
1269 antarctic krill (*euphausia superba*). *Food Chemistry*. Elsevier BV; 2011;125: 1028–1036.  
1270 doi:10.1016/j.foodchem.2010.10.013
- 1271 61. Olsen R, Suontama J, Langmyhr E, Mundheim H, Ringo E, Melle W, et al. The replacement of fish meal with  
1272 antarctic krill, *euphausia superba* in diets for atlantic salmon, *salmo salar*. *Aquaculture Nutrition*. Wiley;  
1273 2006;12: 280–290. doi:10.1111/j.1365-2095.2006.00400.x
- 1274 62. Rungruangsak-Torrissen K. Digestive Efficiency, Growth And Qualities Of Muscle And Oocyte In Atlantic  
1275 Salmon (*Salmo Salar L.*) Fed On Diets With Krill Meal As An Alternative Protein Source. *Journal of Food*  
1276 *Biochemistry*. Wiley; 2007;31: 509–540. doi:10.1111/j.1745-4514.2007.00127.x
- 1277 63. Klein ES, Hill SL, Hinke JT, Phillips T, Watters GM. Impacts of rising sea temperature on krill increase risks  
1278 for predators in the scotia sea. *PLOS ONE*. 2018;13: e0191011–null. doi:10.1371/journal.pone.0191011
- 1279 64. Constable A. Lessons from ccamlr on the implementation of the ecosystem approach to managing  
1280 fisheries. *Fish and Fisheries*. 2011;12: 138–151. doi:10.1111/j.1467-2979.2011.00410.x
- 1281 65. Rogers AD, Frinault B, Barnes DKA, Bindoff NL, Downie R, Ducklow HW, et al. Antarctic futures: An  
1282 assessment of climate-driven changes in ecosystem structure, function, and service provisioning in the  
1283 southern ocean. *Annual Review of Marine Science*. 2019;12: 87–120. doi:10.1146/annurev-marine-010419-  
1284 011028
- 1285 66. Boyd IL, Arnould JPY, Barton T, Croxall JP. Foraging behaviour of antarctic fur seals during periods of  
1286 contrasting prey abundance. *Journal of Animal Ecology*. 1994;63: 703–713. doi:10.2307/5235
- 1287 67. Reid K, Arnould JPY. The diet of antarctic fur seals *arctocephalus gazella* during the breeding season at  
1288 south georgia. *Polar Biology*. 1996;16: 105–114. doi:10.1007/bf02390431
- 1289 68. Mora A, García-Peña FJ, Alonso MP, Pedraza-Díaz S, Ortega-Mora LM, García-Párraga D, et al. Impact of  
1290 human-associated *escherichia coli* clonal groups in antarctic pinnipeds: Presence of st73, st95, st141 and  
1291 st131. *Scientific Reports*. 2018;8: 4678–null. doi:10.1038/s41598-018-22943-0
- 1292 69. Buckley BA. Regulation of heat shock genes in isolated hepatocytes from an antarctic fish, *trematomus*  
1293 *bernacchii*. *Journal of Experimental Biology*. The Company of Biologists; 2004;207: 3649–3656.  
1294 doi:10.1242/jeb.01219
- 1295 70. Hofmann GE, Buckley BA, Airaksinen S, Keen JE, Somero GN. Heat-shock protein expression is absent in  
1296 the antarctic fish *trematomus bernacchii* (family nototheniidae). *The Journal of experimental biology*.  
1297 2000;203: 2331–2339. Available: <https://lens.org/105-855-723-481-997>
- 1298 71. Anderson EM, Larsson KM, Kirk O. One biocatalyst–many applications: The use of *candida antarctica* b-  
1299 lipase in organic synthesis. *Biocatalysis and Biotransformation*. 1998;16: 181–204.  
1300 doi:10.3109/10242429809003198
- 1301 72. Lau RM, Rantwijk FV, Seddon KR, Sheldon RA. Lipase-catalyzed reactions in ionic liquids. *Organic Letters*.  
1302 American Chemical Society (ACS); 2000;2: 4189–4191. doi:10.1021/ol006732d
- 1303 73. Bastida A, Sabuquillo P, Armisen P, Fernandez-Lafuente R, Huguete J, Guisan JM. A single step purification,  
1304 immobilization, and hyperactivation of lipases via interfacial adsorption on strongly hydrophobic supports.  
1305 *Biotechnology and Bioengineering*. 1998;58: 486–493. doi:10.1002/(sici)1097-  
1306 0290(19980605)58:5<486::aid-bit4>3.3.co;2-e; 10.1002/(sici)1097-0290(19980605)58:5<486::aid-  
1307 bit4>3.0.co;2-9
- 1308 74. Shimada Y, Watanabe Y, Sugihara A, Tominaga Y. Enzymatic alcoholysis for biodiesel fuel production and  
1309 application of the reaction to oil processing. *Journal of Molecular Catalysis B: Enzymatic*. Elsevier BV;  
1310 2002;17: 133–142. doi:10.1016/s1381-1177(02)00020-6



- 1311 75. Nelson LA, Foglia TA, Marmer WN. Lipase-catalyzed production of biodiesel. *Journal of the American Oil*  
1312 *Chemists Society*. Wiley; 1996;73: 1191–1195. doi:10.1007/bf02523383
- 1313 76. Shimada Y, Watanabe Y, Samukawa T, Sugihara A, Noda H, Fukuda H, et al. Conversion of vegetable oil to  
1314 biodiesel using immobilized candida antarctica lipase. *Journal of the American Oil Chemists Society*. Wiley;  
1315 1999;76: 789–793. doi:10.1007/s11746-999-0067-6
- 1316 77. Liu Q, Janssen MHA, Rantwijk F van, Sheldon RA. Room-temperature ionic liquids that dissolve  
1317 carbohydrates in high concentrations. *Green Chemistry*. Royal Society of Chemistry (RSC); 2005;7: 39.  
1318 doi:10.1039/b412848f
- 1319 78. Gotor-Fernandez V, Busto E, Gotor V. Candida antarctica lipase b: An ideal biocatalyst for the preparation  
1320 of nitrogenated organic compounds. *ChemInform*. Wiley; 2006;37. doi:10.1002/chin.200635254
- 1321 79. Kulakova L, Galkin A, Nakayama T, Nishino T, Esaki N. Cold-active esterase from psychrobacter sp.  
1322 Ant300: Gene cloning, characterization, and the effects of gly $\rightarrow$ Pro substitution near the active site on its  
1323 catalytic activity and stability. *Biochimica et Biophysica Acta (BBA) - Proteins and Proteomics*. Elsevier BV;  
1324 2004;1696: 59–65. doi:10.1016/j.bbapap.2003.09.008
- 1325 80. Feller G, Thiry M, Arpigny JL, Gerday C. Cloning and expression in escherichia coli of three lipase-encoding  
1326 genes from the psychrotrophic antarctic strain moraxella TA144. *Gene*. Elsevier BV; 1991;102: 111–115.  
1327 doi:10.1016/0378-1119(91)90548-p
- 1328 81. Coker JA, Sheridan PP, Loveland-Curtze J, Gutshall KR, Auman AJ, Brenchley JE. Biochemical  
1329 characterization of a  $\beta$ -galactosidase with a low temperature optimum obtained from an antarctic  
1330 arthrobacter isolate. *Journal of Bacteriology*. American Society for Microbiology; 2003;185: 5473–5482.  
1331 doi:10.1128/jb.185.18.5473-5482.2003
- 1332 82. Karentz D, Lutze LH. Evaluation of biologically harmful ultraviolet radiation in antarctica with a biological  
1333 dosimeter designed for aquatic environments. *Limnology and Oceanography*. Wiley; 1990;35: 549–561.  
1334 doi:10.4319/lo.1990.35.3.0549
- 1335 83. Power ML, Samuel A, Smith JJ, Stark JS, Gillings MR, Gordon DM. Escherichia coli out in the cold:  
1336 Dissemination of human-derived bacteria into the antarctic microbiome. *Environmental Pollution*. 2016;215:  
1337 58–65. doi:10.1016/j.envpol.2016.04.013
- 1338 84. González-Acuña D, Hernandez J, Moreno L, Herrmann B, Palma RL, Latorre A, et al. Health evaluation of  
1339 wild gentoo penguins (pygoscelis papua) in the antarctic peninsula. *Polar Biology*. 2013;36: 1749–1760.  
1340 doi:10.1007/s00300-013-1394-5
- 1341 85. Medigue C. Coping with cold: The genome of the versatile marine antarctica bacterium  
1342 pseudoalteromonas haloplanktis TAC125. *Genome Research*. Cold Spring Harbor Laboratory; 2005;15: 1325–  
1343 1335. doi:10.1101/gr.4126905
- 1344 86. Piette F, DAmico S, Struvay C, Mazzucchelli G, Renaut J, Tutino ML, et al. Proteomics of life at low  
1345 temperatures: Trigger factor is the primary chaperone in the antarctic bacteriumPseudoalteromonas  
1346 haloplanktisTAC125. *Molecular Microbiology*. Wiley; 2010;76: 120–132. doi:10.1111/j.1365-  
1347 2958.2010.07084.x
- 1348 87. Garsoux G, Lamotte J, Gerday C, Feller G. Kinetic and structural optimization to catalysis at low  
1349 temperatures in a psychrophilic cellulase from the antarctic bacteriumPseudoalteromonas haloplanktis.  
1350 *Biochemical Journal*. Portland Press Ltd. 2004;384: 247–253. doi:10.1042/bj20040325
- 1351 88. Hoyoux A, Jennes I, Dubois P, Genicot S, Dubail F, Francois JM, et al. Cold-adapted beta-galactosidase from  
1352 the antarctic psychrophile pseudoalteromonas haloplanktis. *Applied and Environmental Microbiology*.  
1353 American Society for Microbiology; 2001;67: 1529–1535. doi:10.1128/aem.67.4.1529-1535.2001



- 1354 89. Yakimov MM. *Oleispira antarctica* gen. Nov., sp. Nov., a novel hydrocarbonoclastic marine bacterium  
1355 isolated from antarctic coastal sea water. *International Journal of Systematic and Evolutionary Microbiology*.  
1356 *Microbiology Society*; 2003;53: 779–785. doi:10.1099/ijs.0.02366-0
- 1357 90. Coulon F, McKew BA, Osborn AM, McGenity TJ, Timmis KN. Effects of temperature and biostimulation on  
1358 oil-degrading microbial communities in temperate estuarine waters. *Environmental Microbiology*. Wiley;  
1359 2007;9: 177–186. doi:10.1111/j.1462-2920.2006.01126.x
- 1360 91. Parnikoza I, Kozeretska I, Kunakh V. Vascular plants of the maritime antarctic: Origin and adaptation.  
1361 *American Journal of Plant Sciences*. 2011;2: 381–395. doi:10.4236/ajps.2011.23044
- 1362 92. Bravo LA, Ulloa N, Zuñiga GE, Casanova A, Corcuera LJ, Alberdi M. Cold resistance in antarctic  
1363 angiosperms. *Physiologia Plantarum*. Wiley; 2001;111: 55–65. doi:10.1034/j.1399-3054.2001.1110108.x
- 1364 93. Smith RIL. Vascular plants as bioindicators of regional warming in antarctica. *Oecologia*. Springer Nature;  
1365 1994;99: 322–328. doi:10.1007/bf00627745
- 1366 94. Pérez-Torres E, García A, Dinamarca J, Alberdi M, Gutiérrez A, Gidekel M, et al. The role of photochemical  
1367 quenching and antioxidants in photoprotection of *deschampsia antarctica*. *Functional Plant Biology*. CSIRO  
1368 Publishing; 2004;31: 731. doi:10.1071/fp03082
- 1369 95. Salvucci ME. Relationship between the heat tolerance of photosynthesis and the thermal stability of  
1370 rubisco activase in plants from contrasting thermal environments. *Plant Physiology*. American Society of  
1371 *Plant Biologists (ASPB)*; 2004;134: 1460–1470. doi:10.1104/pp.103.038323
- 1372 96. Day TA, Ruhland CT, Grobe CW, Xiong F. Growth and reproduction of antarctic vascular plants in response  
1373 to warming and UV radiation reductions in the field. *Oecologia*. Springer Science; Business Media LLC;  
1374 1999;119: 24–35. doi:10.1007/s004420050757
- 1375 97. Robinson SA, Wasley J, Tobin AK. Living on the edge - plants and global change in continental and  
1376 maritime antarctica. *Global Change Biology*. Wiley; 2003;9: 1681–1717. doi:10.1046/j.1365-  
1377 2486.2003.00693.x
- 1378 98. DiTullio GR, Grebmeier JM, Arrigo KR, Lizotte MP, Robinson DH, Leventer A, et al. Rapid and early export  
1379 of phaeocystis antarctica blooms in the ross sea, antarctica. *Nature*. 2000;404: 595–598.  
1380 doi:10.1038/35007061
- 1381 99. Bender SJ, Moran DM, McIlvin MR, Zheng H, McCrow JP, Badger JH, et al. Iron triggers colony formation in  
1382 phaeocystis antarctica : Connecting molecular mechanisms with iron biogeochemistry. 2018; doi:10.5194/bg-  
1383 2017-558
- 1384 100. Koch F, Beszteri S, Harms L, Trimborn S. The impacts of iron limitation and ocean acidification on the  
1385 cellular stoichiometry, photophysiology, and transcriptome of phaeocystis antarctica. *Limnology and*  
1386 *Oceanography*. 2018;64: 357–375. doi:10.1002/lno.11045
- 1387 101. Trimborn S, Thoms S, Brenneis T, Heiden JP, Beszteri S, Bischof K. Two southern ocean diatoms are more  
1388 sensitive to ocean acidification and changes in irradiance than the prymnesiophyte phaeocystis antarctica.  
1389 *Physiologia Plantarum*. 2017;160: 155–170. doi:10.1111/ppl.12539
- 1390 102. Arrigo K. Iron fertilization of the southern ocean: Regional simulation and analysis of c-sequestration in  
1391 the ross sea [Internet]. 2012. doi:10.2172/1036239
- 1392 103. Oldham PD, Szerszynski B, Stilgoe J, Brown C, Eacott B, Yuille A. Mapping the landscape of climate  
1393 engineering. *Philosophical Transactions of the Royal Society A*. 2014;372: 20140065–null.  
1394 doi:10.1098/rsta.2014.0065

- 1395 104. Ortiz J, Romero N, Robert P, Araya J, López-Hernández J, Bozzo C, et al. Dietary fiber, amino acid, fatty  
1396 acid and tocopherol contents of the edible seaweeds *ulva lactuca* and *durvillaea antarctica*. *Food Chemistry*.  
1397 2006;99: 98–104. doi:10.1016/j.foodchem.2005.07.027
- 1398 105. Helmuth B, Veit RR, Holberton RL. Long-distance dispersal of a subantarctic brooding bivalve (*Gaimardia*  
1399 *trapesina*) by kelp-rafting. *Marine Biology*. 1994;120: 421–426. doi:10.1007/bf00680216
- 1400 106. Ortiz J, Romero N, Robert P, Araya J, Lopez-Hernández J, Bozzo C, et al. Dietary fiber, amino acid, fatty  
1401 acid and tocopherol contents of the edible seaweeds *ulva lactuca* and *durvillaea antarctica*. *Food Chemistry*.  
1402 Elsevier BV; 2006;99: 98–104. doi:10.1016/j.foodchem.2005.07.027
- 1403 107. Vergarafernandez A, Vargas G, Alarcon N, Velasco A. Evaluation of marine algae as a source of biogas in a  
1404 two-stage anaerobic reactor system. *Biomass and Bioenergy*. Elsevier BV; 2008;32: 338–344.  
1405 doi:10.1016/j.biombioe.2007.10.005
- 1406 108. Stier H, Ebbeskotte V, Gruenwald J. Immune-modulatory effects of dietary yeast beta-1,3/1,6-d-glucan.  
1407 *Nutrition Journal*. Springer Nature; 2014;13. doi:10.1186/1475-2891-13-38
- 1408 109. Skjermo J, Størseth TR, Hansen K, Handå A, Øie G. Evaluation of  $\beta$ -(1→3, 1→6)-glucans and high-m  
1409 alginate used as immunostimulatory dietary supplement during first feeding and weaning of atlantic cod  
1410 (*Gadus morhua* L.). *Aquaculture*. Elsevier BV; 2006;261: 1088–1101. doi:10.1016/j.aquaculture.2006.07.035
- 1411 110. Laybourn-Parry J, Marshall Wa, Marchant Hj. Flagellate nutritional versatility as a key to survival in two  
1412 contrasting antarctic saline lakes. *Freshwater Biology*. Wiley; 2005;50: 830–838. doi:10.1111/j.1365-  
1413 2427.2005.01369.x
- 1414 111. Marchant H, Perrin R. Seasonal variation in abundance and species composition of choanoflagellates  
1415 (*Acanthoecidae*) at antarctic coastal sites. *Polar Biology*. Springer Nature; 1990;10. doi:10.1007/bf00233698
- 1416 112. Thomsen H, Larsen J. Loricated choanoflagellates of the southern ocean with new observations on cell  
1417 division in *Bicosta spinifera* (Thomsen, 1970) from Antarctica and *Saroecca attenuata* Thomsen, 1979, from  
1418 the Baltic Sea. *Polar Biology*. Springer Nature; 1992;12. doi:10.1007/bf00239965
- 1419 113. Marchant HJ, Perrin RA. Seasonal variation in abundance and species composition of choanoflagellates  
1420 (*Acanthoecidae*) at antarctic coastal sites. *Polar Biology*. 1990;10: 499–505. doi:10.1007/bf00233698
- 1421 114. Hempel G. Weddell sea ecology: Results of epos european "polarstern" study [Internet]. 2011. Available:  
1422 <http://ci.nii.ac.jp/ncid/BA20482699>; <https://lens.org/067-643-706-475-607>
- 1423 115. Koppel DJ, Gissi F, Adams MS, King CK, Jolley DF. Chronic toxicity of five metals to the polar marine  
1424 microalga *Cryptothecomonas armigera* application of a new bioassay. *Environmental Pollution*. Elsevier BV;  
1425 2017;228: 211–221. doi:10.1016/j.envpol.2017.05.034
- 1426 116. Koppel DJ, Adams MS, King CK, Jolley DF. Chronic toxicity of an environmentally relevant and equitoxic  
1427 ratio of five metals to two antarctic marine microalgae shows complex mixture interactivity. *Environmental*  
1428 *Pollution*. Elsevier BV; 2018;242: 1319–1330. doi:10.1016/j.envpol.2018.07.110
- 1429 117. Koppel DJ, Adams MS, King CK, Jolley DF. Diffusive gradients in thin films can predict the toxicity of metal  
1430 mixtures to two microalgae: Validation for environmental monitoring in antarctic marine conditions.  
1431 *Environmental Toxicology and Chemistry*. Wiley; 2019;38: 1323–1333. doi:10.1002/etc.4399
- 1432 118. Saunders NF. Mechanisms of thermal adaptation revealed from the genomes of the antarctic archaea  
1433 *Methanogenium frigidum* and *Methanococcoides burtonii*. *Genome Research*. Cold Spring Harbor Laboratory;  
1434 2003;13: 1580–1588. doi:10.1101/gr.1180903

- 1435 119. Goodchild A, Saunders NFW, Ertan H, Raftery M, Guilhaus M, Curmi PMG, et al. A proteomic  
1436 determination of cold adaptation in the antarctic archaeon, *methanococcoides burtonii*. *Molecular*  
1437 *Microbiology*. Wiley; 2004;53: 309–321. doi:10.1111/j.1365-2958.2004.04130.x
- 1438 120. Nichols DS, Miller MR, Davies NW, Goodchild A, Raftery M, Cavicchioli R. Cold adaptation in the antarctic  
1439 archaeon *methanococcoides burtonii* involves membrane lipid unsaturation. *Journal of Bacteriology*.  
1440 *American Society for Microbiology*; 2004;186: 8508–8515. doi:10.1128/jb.186.24.8508-8515.2004
- 1441 121. DasSarma S, Capes MD, Karan R, DasSarma P. Amino acid substitutions in cold-adapted proteins from  
1442 *halorubrum lacusprofundi*, an extremely halophilic microbe from antarctica. *PLOS ONE*. 2013;8: e58587–null.  
1443 doi:10.1371/journal.pone.0058587
- 1444 122. Kepner RL, Wharton RA, Suttle CA. Viruses in antarctic lakes. *Limnology and Oceanography*. 1998;43:  
1445 1754–1761. doi:10.4319/lo.1998.43.7.1754
- 1446 123. Bengtson JL, Boveng PL, Franzén U, Have P, Heide-Jørgensen M, Härkönen T. ANTIBODIES to canine  
1447 distemper virus in antarctic seals. *Marine Mammal Science*. 1991;7: 85–87. doi:10.1111/j.1748-  
1448 7692.1991.tb00553.x
- 1449 124. Harder TC, Plötz J, Liess B. Antibodies against european phocine herpesvirus isolates detected in sera of  
1450 antarctic seals. *Polar Biology*. 1991;11: 509–512. doi:10.1007/bf00233087
- 1451 125. Bressemer M-FV, Waerebeek KV, Raga JA. A review of virus infections of cetaceans and the potential  
1452 impact of morbilliviruses, poxviruses and papillomaviruses on host population dynamics. *Diseases of Aquatic*  
1453 *Organisms*. 1999;38: 53–65. doi:10.3354/dao038053
- 1454 126. Guzmán-Verri C, González-Barrientos R, Hernández-Mora G, Morales J-A, Baquero-Calvo E, Chaves-Olarte  
1455 E, et al. *Brucella ceti* and brucellosis in cetaceans. *Frontiers in Cellular and Infection Microbiology*. 2012;2: 3–  
1456 3. doi:10.3389/fcimb.2012.00003
- 1457 127. Austin FJ, Webster RG. EVIDENCE of ortho- and paramyxoviruses in fauna from antarctica. *Journal of*  
1458 *Wildlife Diseases*. 1993;29: 568–571. doi:10.7589/0090-3558-29.4.568
- 1459 128. Pyper W. Sub-antarctic penguins infected with tick-borne viruses. *Australian Antarctic Magazine*. 2009;  
1460 28–null. Available: <http://search.informit.com.au/documentSummary;dn=863389709748583;res=IELHSS>;  
1461 <https://lens.org/038-292-204-918-240>
- 1462 129. Godinho VM, Furbino LE, Santiago IF, Pellizzari FM, Yokoya NS, Pupo D, et al. Diversity and  
1463 bioprospecting of fungal communities associated with endemic and cold-adapted macroalgae in antarctica.  
1464 *The ISME Journal*. 2013;7: 1434–1451. doi:10.1038/ismej.2013.77
- 1465 130. Furbino LE, Godinho VM, Santiago IF, Pellizzari FM, Alves TMA, Zani CL, et al. Diversity patterns, ecology  
1466 and biological activities of fungal communities associated with the endemic macroalgae across the antarctic  
1467 peninsula. *Microbial Ecology*. 2014;67: 775–787. doi:10.1007/s00248-014-0374-9
- 1468 131. Soares FL, Melo IS de, Dias ACF, Andreote FD. Cellulolytic bacteria from soils in harsh environments.  
1469 *World Journal of Microbiology & Biotechnology*. 2012;28: 2195–2203. doi:10.1007/s11274-012-1025-2
- 1470 132. Dorst J van, Benaud N, Ferrari BC. New insights into the microbial diversity of polar desert soils: A  
1471 biotechnological perspective. Springer International Publishing; 2017. pp. 169–183. doi:10.1007/978-3-319-  
1472 51686-8\_7
- 1473 133. Vester JK, Glaring MA, Stougaard P. Improved cultivation and metagenomics as new tools for  
1474 bioprospecting in cold environments. *Extremophiles*. 2014;19: 17–29. doi:10.1007/s00792-014-0704-3

- 1475 134. Vester JK, Glaring MA, Stougaard P. Discovery of novel enzymes with industrial potential from a cold and  
1476 alkaline environment by a combination of functional metagenomics and culturing. *Microbial Cell Factories*.  
1477 2014;13: 72–72. doi:10.1186/1475-2859-13-72
- 1478 135. Kodzius R, Gojobori T. Marine metagenomics as a source for bioprospecting. *Marine Genomics*. 2015;24:  
1479 21–30. doi:10.1016/j.margen.2015.07.001
- 1480 136. Pascale D de, Santi CD, Fu J, Landfald B. The microbial diversity of polar environments is a fertile ground  
1481 for bioprospecting. *Marine Genomics*. 2012;8: 15–22. doi:10.1016/j.margen.2012.04.004
- 1482 137. Duarte AWF, Santos JA dos, Vianna MV, Vieira J, Mallagutti VH, Inforsato FJ, et al. Cold-adapted enzymes  
1483 produced by fungi from terrestrial and marine antarctic environments. *Critical Reviews in Biotechnology*.  
1484 2017;38: 600–619. doi:10.1080/07388551.2017.1379468
- 1485 138. Martorell MM, Ruberto LAM, Fernández PM, Figueroa LD, Cormack WM. Biodiversity and enzymes  
1486 bioprospection of antarctic filamentous fungi. *Antarctic Science*. 2018;31: 3–12.  
1487 doi:10.1017/s0954102018000421
- 1488 139. Martins RM, Nedel F, Silva Guimarães VB da, Silva AF da, Colepicolo P, Pereira CMP, et al. Macroalgae  
1489 extracts from antarctica have antimicrobial and anticancer potential. *Frontiers in Microbiology*. 2018;9: 412–  
1490 null. doi:10.3389/fmicb.2018.00412
- 1491 140. Silva TR e, Duarte AWF, Passarini MRZ, Ruiz ALTG, Franco CH, Moraes CB, et al. Bacteria from antarctic  
1492 environments: Diversity and detection of antimicrobial, antiproliferative, and antiparasitic activities. *Polar  
1493 Biology*. 2018;41: 1505–1519. doi:10.1007/s00300-018-2300-y
- 1494 141. Jabour-Green J, Nicol D. Bioprospecting in areas outside national jurisdiction: Antarctica and the  
1495 southern ocean. *Melbourne Journal of International Law*. 2003;4: 76–111. Available:  
1496 [https://www.questia.com/library/journal/1G1-108837717/bioprospecting-in-areas-outside-national-](https://www.questia.com/library/journal/1G1-108837717/bioprospecting-in-areas-outside-national-jurisdiction)  
1497 <http://ecite.utas.edu.au/27072>; <https://eprints.utas.edu.au/2668/>;  
1498 <http://ecite.utas.edu.au/27072/2/03Green-Nicol.pdf>; <https://lens.org/199-301-537-108-254>
- 1499 142. Nicol D. Antarctic bioprospecting, benefit sharing and cooperation in antarctic science. *Australian  
1500 Antarctic Magazine*. 2004;6: 10–11. Available: <http://ecite.utas.edu.au/31180/>; [https://lens.org/190-319-](https://lens.org/190-319-605-207-800)  
1501 [605-207-800](https://lens.org/190-319-605-207-800)
- 1502 143. Herber BP. Bioprospecting in antarctica: The search for a policy regime. *Polar Record*. 2006;42: 139–  
1503 146. Available: [http://www.journals.cambridge.org/abstract\\_S0032247406005158](http://www.journals.cambridge.org/abstract_S0032247406005158);  
1504 [https://www.cambridge.org/core/journals/polar-record/article/bioprospecting-in-antarctica-the-search-](https://www.cambridge.org/core/journals/polar-record/article/bioprospecting-in-antarctica-the-search-for-a-policy-regime/7E5759AD2156668BB8AFF090585027A85)  
1505 [for-a-policy-regime/7E5759AD2156668BB8AFF090585027A85](https://www.cambridge.org/core/journals/polar-record/article/bioprospecting-in-antarctica-the-search-for-a-policy-regime/7E5759AD2156668BB8AFF090585027A85); <https://lens.org/029-565-023-980-701>
- 1506 144. Leary D, Walton DW. Science for profit. What are the ethical implications of bioprospecting in the arctic  
1507 and antarctica. *Ethics in Science and Environmental Politics*. 2010;10: 1–4. doi:10.3354/ese00107
- 1508 145. Hemmings AD. Does bioprospecting risk moral hazard for science in the antarctic treaty system. *Ethics in  
1509 Science and Environmental Politics*. 2010;10: 5–12. doi:10.3354/ese00103
- 1510 146. Guyomard A-I. Ethics and bioprospecting in antarctica. *Ethics in Science and Environmental Politics*.  
1511 2010;10: 31–44. doi:10.3354/ese00104
- 1512 147. Hughes KA, Bridge PD. Potential impacts of antarctic bioprospecting and associated commercial  
1513 activities upon antarctic science and scientists. *Ethics in Science and Environmental Politics*. 2010;10: 13–18.  
1514 doi:10.3354/ese00106
- 1515 148. Puig-Marcó R. Access and benefit sharing of antarctica's biological material. *Marine Genomics*. 2014;17:  
1516 73–78. doi:10.1016/j.margen.2014.04.008

- 1517 149. Oldham P. Global status and trends in intellectual property claims: Genomics, proteomics and  
1518 biotechnology. SSRN Electronic Journal. 2004; null-null. doi:10.2139/ssrn.1331514
- 1519 150. Laird SA, Wynberg RP. A fact-finding and scoping study on digital sequence information on genetic  
1520 resources in the context of the convention on biological diversity and the nagoya protocol [Internet]. 2018.  
1521 Available: [https://www.cbd.int/doc/c/e95a/4ddd/4baea2ec772be28edcd10358/dsi-ahteg-2018-01-03-](https://www.cbd.int/doc/c/e95a/4ddd/4baea2ec772be28edcd10358/dsi-ahteg-2018-01-03-en.pdf)  
1522 [en.pdf](https://www.cbd.int/doc/c/e95a/4ddd/4baea2ec772be28edcd10358/dsi-ahteg-2018-01-03-en.pdf)
- 1523 151. Aubry S. The future of digital sequence information for plant genetic resources for food and agriculture.  
1524 *Frontiers in Plant Science*. 2019;10: 1046-null. doi:10.3389/fpls.2019.01046
- 1525 152. Houssen W, Sara R, Jaspars M. Digital sequence information on genetic resources: Concept, scope and  
1526 current use. 2019; Available: [https://www.cbd.int/abs/DSI-peer/Study1\\_concept\\_scope.pdf](https://www.cbd.int/abs/DSI-peer/Study1_concept_scope.pdf)
- 1527 153. Bagley M, Karger E, Muller MR, Perron-Welch F, Thambisetty S. Fact-finding study on how domestic  
1528 measures address benefit-sharing arising from commercial and non-commercial use of digital sequence  
1529 information on genetic resources and address the use of digital sequence information on genetic resources  
1530 for research and development [Internet]. 2019. Available: [https://www.cbd.int/abs/DSI-](https://www.cbd.int/abs/DSI-peer/Study4_domestic_measures.pdf)  
1531 [peer/Study4\\_domestic\\_measures.pdf](https://www.cbd.int/abs/DSI-peer/Study4_domestic_measures.pdf)
- 1532 154. Rohden F, Huang S, Dröge G, Scholz AH, Barker K, Berendsohn WG, et al. Combined study on dsi in public  
1533 and private databases and dsi traceability [Internet]. 2019. Available: [https://www.cbd.int/abs/DSI-](https://www.cbd.int/abs/DSI-peer/Study-Traceability-databases.pdf)  
1534 [peer/Study-Traceability-databases.pdf](https://www.cbd.int/abs/DSI-peer/Study-Traceability-databases.pdf)
- 1535 155. Arrieta JM, Arnaud-Haond S, Duarte CM. What lies underneath: Conserving the oceans genetic resources.  
1536 *Proceedings of the National Academy of Sciences*. *Proceedings of the National Academy of Sciences*;  
1537 2010;107: 18318–18324. doi:10.1073/pnas.0911897107
- 1538 156. Arnaud-Haond S, Arrieta JM, Duarte CM. Marine biodiversity and gene patents. *Science*. American  
1539 Association for the Advancement of Science (AAAS); 2011;331: 1521–1522. doi:10.1126/science.1200783
- 1540 157. Paul Oldham CB Stephen Hall. Valuing the Deep: Marine Genetic Resources in Areas Beyond National  
1541 Jurisdiction [Internet]. Department for Environment Food; Rural Affairs (DEFRA), UK; 2014 pp. 1–241.  
1542 doi:10.13140/2.1.2612.5605
- 1543 158. Blasiak R, Jouffray J-B, Wabnitz CC, Sundström E, Österblom H. Corporate control and global governance  
1544 of marine genetic resources. *Science Advances*. 2018;4: eaar5237-null. doi:10.1126/sciadv.aar5237
- 1545 159. Jefferson OA, Köllhofer D, Ehrlich TH, Jefferson RA. Transparency tools in gene patenting for informing  
1546 policy and practice. *Nature Biotechnology*. 2013;31: 1086–1093. doi:10.1038/nbt.2755
- 1547 160. Oldham PD, Hall S, Forero O. Biological diversity in the patent system. *PLOS ONE*. 2013;8: e78737-null.  
1548 doi:10.1371/journal.pone.0078737
- 1549 161. T HT. Enzymatic synthesis of waxes [Internet]. US 4826767 A, 1989. Available: [https://lens.org/183-](https://lens.org/183-190-631-027-717)  
1550 [190-631-027-717](https://lens.org/183-190-631-027-717)
- 1551 162. Allan S, Anant PS, Michi E-m, Kim B, Groth CI, Trier HM. C. Antarctica lipase and lipase variants  
1552 [Internet]. WO 1994/001541 A1, 1994. Available: <https://lens.org/126-492-686-683-371>
- 1553 163. Shawn D. Remodeling and glycopegylation of fibroblast growth factor (fgf) [Internet]. WO 2006/050247  
1554 A2, 2006. Available: <https://lens.org/038-672-764-864-978>
- 1555 164. Hui L, Ankush A, Rajinder S, Sambaiah T, David C, Kin T, et al. Cycloalkyl substituted pyrimidinediamine  
1556 compounds and their uses [Internet]. US 7858633 B2, 2011. Available: [https://lens.org/074-665-824-262-](https://lens.org/074-665-824-262-697)  
1557 [697](https://lens.org/074-665-824-262-697)



- 1558 165. C AC. Structured lipids [Internet]. US 6369252 B1, 2002. Available: <https://lens.org/107-832-346-625-1559>
- 1560 166. Wen-teng W, Jech-wei C. Method of preparing lower alkyl fatty acids esters and in particular biodiesel  
1561 [Internet]. US 6398707 B1, 2002. Available: <https://lens.org/122-111-794-922-627>
- 1562 167. Asgeir S, Carl S, Daria J, Gudmundur H. Conjugated linoleic acid compositions and methods of making  
1563 same [Internet]. US 6410761 B1, 2002. Available: <https://lens.org/094-748-329-676-963>
- 1564 168. Catherine T, Xiaodong L, Ming Q, Marketa R, Guy S, Mark Z. Flavors, flavor modifiers, tastants, taste  
1565 enhancers, umami or sweet tastants, and/or enhancers and use thereof [Internet]. US 7476399 B2, 2009.  
1566 Available: <https://lens.org/093-014-849-112-732>
- 1567 169. Foster J, Nicol S, Kawaguchi S. The use of patent databases to predict trends in the krill fishery. *Ccamlr*  
1568 *Science*. 2011;18: 135–144. Available: <https://lens.org/060-599-347-188-955>
- 1569 170. Yamaguchi K, Murakami M, Nakano H, Konosu S, Kokura T, Yamamoto H, et al. Supercritical carbon  
1570 dioxide extraction of oils from antarctic krill. *Journal of Agricultural and Food Chemistry*. 1986;34: 904–907.  
1571 doi:10.1021/jf00071a034
- 1572 171. Finn M, Nils H, Håvard T. Phospholipid compositions and their preparation [Internet]. US 9867856 B2,  
1573 2018. Available: <https://lens.org/011-348-907-388-821>
- 1574 172. Inge B, Mikko G, Snorre T, Sebastiano B, Jeffrey C, Daniele M. Bioeffective krill oil compositions [Internet].  
1575 WO 2008/117062 A1, 2008. Available: <https://lens.org/121-122-631-692-465>
- 1576 173. Mose LP, John FS. Thrombosis preventing krill extract [Internet]. WO 2007/080515 A1, 2007. Available:  
1577 <https://lens.org/093-453-817-763-64X>
- 1578 174. Inge B, Snorre T, Jeffery C, Mikko G, Daniele M, Nils H, et al. Methods of using krill oil to treat risk factors  
1579 for cardiovascular, metabolic, and inflammatory disorders [Internet]. US 8697138 B2, 2014. Available:  
1580 <https://lens.org/148-076-064-464-591>
- 1581 175. Fotini S, Henri H. Concentrated therapeutic phospholipid compositions [Internet]. US 8586567 B2, 2013.  
1582 Available: <https://lens.org/015-218-496-395-882>
- 1583 176. Snorre T, Nils H. Phospholipid and protein tablets [Internet]. US 8372812 B2, 2013. Available:  
1584 <https://lens.org/146-794-117-594-239>
- 1585 177. Snorre T, Øistein H. Method for making krill meal [Internet]. US 2015/0050403 A1, 2015. Available:  
1586 <https://lens.org/196-498-262-945-493>
- 1587 178. Inge B, Mikko G, Rune RS. Compositions and methods for nutritional supplementation [Internet]. US  
1588 2012/0231087 A1, 2012. Available: <https://lens.org/048-513-968-558-360>
- 1589 179. M KW, Leo N, Alex O. Feed additive [Internet]. EP 3456205 A1, 2019. Available: <https://lens.org/064-1590-509-646-853-285>
- 1591 180. A MJ, Stephen HW, E MR. Therapeutic astaxanthin and phospholipid composition and associated method  
1592 [Internet]. US 9763897 B2, 2017. Available: <https://lens.org/154-620-924-659-65X>
- 1593 181. Oskar RW. A primarily anhydrous composition, in particular for use as nutritional supplements  
1594 [Internet]. EP 3473240 A1, 2019. Available: <https://lens.org/107-222-989-181-812>
- 1595 182. Junichi O, Tomomi Y, Koretaro T, Takeya Y. Lipid composition and method for producing same [Internet].  
1596 US 10246663 B2, 2019. Available: <https://lens.org/181-471-030-132-253>



- 1597 183. Nichols DS, Bowman J, Sanderson K, Nichols CM, Lewis T, McMeekin T, et al. DEVELOPMENTS with  
1598 antarctic microorganisms : CULTURE collections, bioactivity screening, taxonomy, pufa production and cold-  
1599 adapted enzymes. *Current Opinion in Biotechnology*. 1999;10: 240–246. doi:10.1016/s0958-1669(99)80042-  
1600 1
- 1601 184. A WC, Ross Z, G MJ. Pufa polyketide synthase systems and uses thereof [Internet]. US 7560539 B2, 2009.  
1602 Available: <https://lens.org/011-162-190-324-701>
- 1603 185. G MJ, M KJ, Casey LJ. Polyunsaturated fatty acid production in heterologous organisms using pufa  
1604 polyketide synthase systems [Internet]. US 7759548 B2, 2010. Available: <https://lens.org/044-044-796-740-072>  
1605 072
- 1606 186. Rolf M, Silke W, Shawn R, Katja G. Production of fatty acids by heterologous expression of gene clusters  
1607 from myxobacteria [Internet]. EP 2390343 A1, 2011. Available: <https://lens.org/105-403-574-937-294>
- 1608 187. A WC, Ross Z, H DD, G MJ. Chimeric pufa polyketide synthase systems and uses thereof [Internet]. US  
1609 8003772 B2, 2011. Available: <https://lens.org/042-707-862-350-34X>
- 1610 188. Marc S, Ernst R, Rolf M, O GR, Dominik P, Alexander B. Production of omega-3 fatty acids by  
1611 myxobacteria [Internet]. WO 2010/063451 A2, 2010. Available: <https://lens.org/000-730-545-455-625>
- 1612 189. Skerratt J, Bowman JP, Nichols PD. *Shewanella olleyana* sp. Nov., a marine species isolated from a  
1613 temperate estuary which produces high levels of polyunsaturated fatty acids. *International Journal of*  
1614 *Systematic and Evolutionary Microbiology*. 2002;52: 2101–2106. doi:10.1099/ijs.0.02351-0;  
1615 10.1099/00207713-52-6-2101
- 1616 190. Wharton DA, Judge KF, Worland MR. Cold acclimation and cryoprotectants in a freeze-tolerant antarctic  
1617 nematode, *panagrolaimus davidi*. *Journal of Comparative Physiology B-biochemical Systemic and*  
1618 *Environmental Physiology*. 2000;170: 321–327. doi:10.1007/s003600000106
- 1619 191. Mitchell L. Tissue treatment methods [Internet]. US 8192474 B2, 2012. Available: <https://lens.org/194-569-607-851-234>  
1620 569-607-851-234
- 1621 192. Joseph T, W TS, Timothy R, Richard W. Cooling device for removing heat from subcutaneous lipid-rich  
1622 cells [Internet]. US 8337539 B2, 2012. Available: <https://lens.org/035-742-176-538-342>
- 1623 193. W AJ. Systems and methods with interrupt/resume capabilities for treating subcutaneous lipid-rich cells  
1624 [Internet]. US 8603073 B2, 2013. Available: <https://lens.org/011-572-868-639-291>
- 1625 194. E LM, N RJ, A HC, S SK. Monitoring the cooling of subcutaneous lipid-rich cells, such as the cooling of  
1626 adipose tissue [Internet]. US 8285390 B2, 2012. Available: <https://lens.org/100-924-070-103-554>
- 1627 195. Bahnweg G, Sparrow FK. FOUR new species of thraustochytrium from antarctic regions, with notes on  
1628 the distribution of zoosporic fungi in the antarctic marine ecosystems'. *American Journal of Botany*. 1974;61:  
1629 754–766. doi:10.1002/j.1537-2197.1974.tb12298.x
- 1630 196. R BW. Process for the heterotrophic production of microbial products with high concentrations of  
1631 omega-3 highly unsaturated fatty acids [Internet]. US 7381558 B2, 2008. Available: <https://lens.org/101-258-468-929-959>  
1632 258-468-929-959
- 1633 197. B BR, Don D, M HJ, J MP, M RC, T VIG, et al. Enhanced production of lipids containing polyenoic fatty acid  
1634 by very high density cultures of eukaryotic microbes in fermentors [Internet]. US 8124384 B2, 2012.  
1635 Available: <https://lens.org/030-671-430-051-090>
- 1636 198. R BW. Method of producing lipids by growing microorganisms of the order thraustochyriales [Internet].  
1637 US 7011962 B2, 2006. Available: <https://lens.org/046-871-289-097-563>

- 1638 199. Rainey FA, Ward-Rainey N, Kroppenstedt RM, Stackebrandt E. The genus nocardioopsis represents a  
1639 phylogenetically coherent taxon and a distinct actinomycete lineage: Proposal of nocardioopsaceae fam. Nov.  
1640 International Journal of Systematic and Evolutionary Microbiology. 1996;46: 1088–1092.  
1641 doi:10.1099/00207713-46-4-1088
- 1642 200. Flensted LS, Rahbek OP, Carsten S. Proteases [Internet]. AU 2004/247802 A1, 2004. Available:  
1643 <https://lens.org/075-139-743-730-563>
- 1644 201. Poli A, Anzelmo G, Nicolaus B. Bacterial exopolysaccharides from extreme marine habitats: Production,  
1645 characterization and biological activities. Marine Drugs. 2010;8: 1779–1802. doi:10.3390/md8061779
- 1646 202. Russell MC. Treatment of a subterranean formation with composition including a microorganism or  
1647 compound generated by the same [Internet]. WO 2014/176061 A1, 2014. Available: [https://lens.org/067-](https://lens.org/067-870-744-021-77X)  
1648 [870-744-021-77X](https://lens.org/067-870-744-021-77X)
- 1649 203. Antoine G, Romuald V, Pierre-yves M. Cosmetic composition, useful as antioxidant, comprises  
1650 exopolysaccharide from the bacterium, where the exopolysaccharide comprising repetitive sequence  
1651 consisting of dimer unit of mannose and other sugar having carboxylate function [Internet]. FR 2999929 A1,  
1652 2014. Available: <https://lens.org/041-669-561-232-648>
- 1653 204. Antoine G, Romuald V. Composition cosmetique anti-rides comprenant un exopolysaccharide issu d'une  
1654 bacterie marine. [Internet]. FR 2975910 A1, 2012. Available: <https://lens.org/175-058-181-346-877>
- 1655 205. Antoine G, Romuald V. Composition, useful for regulating sebum secretion and reducing wrinkles and  
1656 fine lines on the skin, comprises exopolysaccharide, which has sebum-regulating properties and is composed  
1657 of a chain of galacturonic acid monomers [Internet]. FR 2975906 A1, 2012. Available: [https://lens.org/198-](https://lens.org/198-785-621-046-102)  
1658 [785-621-046-102](https://lens.org/198-785-621-046-102)
- 1659 206. Lu Y, Chi X, Yang Q, Li Z, Liu S, Gan Q, et al. Molecular cloning and stress-dependent expression of a gene  
1660 encoding  $\delta$ 12-fatty acid desaturase in the antarctic microalga *Chlorella vulgaris* nj-7. Extremophiles. 2009;13:  
1661 875–884. doi:10.1007/s00792-009-0275-x
- 1662 207. Scott F, Aravind S, Janice W, George R, L MJ, Walt R, et al. Tailored oils produced from recombinant  
1663 oleaginous microorganisms [Internet]. US 2012/0277452 A1, 2012. Available: [https://lens.org/135-440-](https://lens.org/135-440-582-668-910)  
1664 [582-668-910](https://lens.org/135-440-582-668-910)
- 1665 208. Scott F, Aravind S, Karen E, George R, Penelope C. Renewable fuels produced from oleaginous  
1666 microorganisms [Internet]. US 9062294 B2, 2015. Available: <https://lens.org/062-667-057-856-980>
- 1667 209. Perry NB, Ettouati L, Litaudon M, Blunt JW, Munro MHG, Parkin S, et al. Alkaloids from the antarctic  
1668 sponge *kirkpatrickia varialosa*. Tetrahedron. 1994;50: 3987–3992. doi:10.1016/s0040-4020(01)89673-3
- 1669 210. Charles MJ, James AR, Modesto R, Ignacio M. Variolin derivatives as anti-cancer agents [Internet]. US  
1670 7320981 B2, 2008. Available: <https://lens.org/078-525-596-274-012>
- 1671 211. Modesto R, Jose GJ, Carlos DP, Carmen C, Simon M, James AR, et al. Variolin derivatives and their use as  
1672 antitumor agents [Internet]. US 7495000 B2, 2009. Available: <https://lens.org/074-434-511-580-397>
- 1673 212. Mercedes A, Fernandez BD, Fernandez PJJL. Derivatives of variolin b [Internet]. AU 2001/276510 B2,  
1674 2007. Available: <https://lens.org/109-857-836-384-59X>
- 1675 213. Heinz W, Thomas B, Mathias S, Silke B, Bernd N. Cyclic indole and heteroindole derivatives, the  
1676 production and use thereof as medicaments [Internet]. WO 2003/020731 A1, 2003. Available:  
1677 <https://lens.org/094-017-826-791-496>

- 1678 214. Salvucci ME, Crafts-Brandner SJ. Relationship between the heat tolerance of photosynthesis and the  
1679 thermal stability of rubisco activase in plants from contrasting thermal environments. *Plant Physiology*.  
1680 2004;134: 1460–1470. doi:10.1104/pp.103.038323
- 1681 215. Rozema J, Björn LO, Bornman JF, Gaberščik A, Häder D-P, Trošt T, et al. The role of uv-b radiation in  
1682 aquatic and terrestrial ecosystems—an experimental and functional analysis of the evolution of uv-absorbing  
1683 compounds. *Journal of Photochemistry and Photobiology B-biology*. 2002;66: 2–12. doi:10.1016/s1011-  
1684 1344(01)00269-x
- 1685 216. Smith RIL. Vascular plants as bioindicators of regional warming in antarctica. *Oecologia*. 1994;99: 322–  
1686 328. doi:10.1007/bf00627745
- 1687 217. Gidekel M, Destefano-beltran L, García P, Mujica L, Leal P, Cuba M, et al. Identification and  
1688 characterization of three novel cold acclimation-responsive genes from the extremophile hair grass  
1689 *deschampsia antarctica* desv. *Extremophiles*. 2003;7: 459–469. doi:10.1007/s00792-003-0345-4
- 1690 218. German S, Peter JU, Martina PR. Ice recrystallisation inhibition protein or antifreeze proteins from  
1691 *deschampsia*, *lolium* and *festuca* species of grass [Internet]. WO 2005/049835 A1, 2005. Available:  
1692 <https://lens.org/014-023-989-800-886>
- 1693 219. Manuel G, Ana G, Leal P, Luis D-b, Jorge D, Emilio G. Plant promoter [Internet]. US 7273931 B2, 2007.  
1694 Available: <https://lens.org/053-289-529-443-956>
- 1695 220. Bravo LA, Griffith M. Characterization of antifreeze activity in antarctic plants. *Journal of Experimental*  
1696 *Botany*. 2005;56: 1189–1196. doi:10.1093/jxb/eri112
- 1697 221. Manuel G, Lucas MCR, Gustavo CB, Carlos SL, Ana GM, Pablo PRJ, et al. Agent for cutaneous  
1698 photoprotection against uva/uvb rays [Internet]. US 8357407 B2, 2013. Available: <https://lens.org/004-963-859-833-206>
- 1700 222. Gwak IG, Jung W sic, Kim HJ, Kang S-H, Jin E. Antifreeze protein in antarctic marine diatom, *chaetoceros*  
1701 *neogracile*. *Marine Biotechnology*. 2009;12: 630–639. doi:10.1007/s10126-009-9250-x
- 1702 223. Suk KH, Jong KM, Jin OS, Yunho G, Young-pil K, Ji-in P, et al. Antifreeze member [Internet]. US 9816021  
1703 B2, 2017. Available: <https://lens.org/019-397-792-679-363>
- 1704 224. Bhattarai HD, Paudel B, Hong SG, Lee HK, Yim JH. Thin layer chromatography analysis of antioxidant  
1705 constituents of lichens from antarctica. *Journal of Natural Medicines*. 2008;62: 481–484.  
1706 doi:10.1007/s11418-008-0257-9
- 1707 225. Han YJ, Il-chan K, Dockyu K, Jong HS, Seok LH, Bhattarai HD, et al. Method for stabilizing ramalin using  
1708 porous matrix, and stablized ramalin solution [Internet]. WO 2013/141576 A1, 2013. Available:  
1709 <https://lens.org/142-125-779-826-306>
- 1710 226. Han YJ, Chan KI, Gu LS, Dockyu K, Jong HS, Seok LH, et al. Method for preparing ramalin [Internet]. WO  
1711 2012/008785 A3, 2012. Available: <https://lens.org/007-962-237-348-18X>
- 1712 227. Han YJ, Kum LH, Datta BH, Paudel B, Chan KI, Gyu HS, et al. Novel compound ramalin, and use thereof  
1713 [Internet]. WO 2010/053327 A2, 2010. Available: <https://lens.org/146-794-606-612-67X>
- 1714 228. Han YJ, Chan KI, Gu LS, Kyu KD, Jong HS, Seok LH, et al. Pharmaceutical composition for the prevention or  
1715 treatment of inflammatory diseases or immune diseases containing ramalin [Internet]. US 2013/0116324 A1,  
1716 2013. Available: <https://lens.org/049-890-848-097-133>
- 1717 229. Il-chan K, Sung-suk S, Han LJ, Jong HS, Joung YU, Kyoung KT, et al. Composition for preventing or treating  
1718 colorectal cancer, containing ramalin as active ingredient [Internet]. WO 2019/059470 A1, 2019. Available:  
1719 <https://lens.org/109-191-363-221-919>

- 1720 230. Hu G-P, Yuan J, Sun LL, She Z, Wu J, Lan X-J, et al. Statistical research on marine natural products based  
1721 on data obtained between 1985 and 2008. *Marine Drugs*. 2011;9: 514–525. doi:10.3390/md9040514
- 1722 231. Diyabalanage T, Amsler CD, McClintock JB, Baker BJ. Palmerolide a, a cytotoxic macrolide from the  
1723 antarctic tunicate synoicum adareanum. *Journal of the American Chemical Society*. 2006;128: 5630–5631.  
1724 doi:10.1021/ja0588508
- 1725 232. Bill B, Thushara D, B MJ, D AC. Cytotoxin compounds and methods of isolation [Internet]. US 8669376 B2,  
1726 2014. Available: <https://lens.org/027-594-410-904-610>
- 1727 233. Reyes F, Fernández R, Rodríguez A, Francesch A, Taboada S, Avila C, et al. Aplicyanins a–f, new cytotoxic  
1728 bromoindole derivatives from the marine tunicate aplidium cyaneum. *Tetrahedron*. 2008;64: 5119–5123.  
1729 doi:10.1016/j.tet.2008.03.060
- 1730 234. Fernando RBJ, Francesch SA, Cuevas MC, Altuna UM, Pla QD, Alvarez DM, et al. Indole derivatives as  
1731 antitumoral compounds [Internet]. US 2009/0124647 A1, 2009. Available: <https://lens.org/083-578-139-958-531>
- 1733 235. Mesa ML, Eastman JT, Vacchi M. The role of notothenioid fish in the food web of the ross sea shelf waters:  
1734 A review. *Polar Biology*. 2004;27: 321–338. doi:10.1007/s00300-004-0599-z
- 1735 236. Eastman JT, DeVries AL. Buoyancy adaptations in a swim-bladderless antarctic fish. *Journal of*  
1736 *Morphology*. 1981;167: 91–102. doi:10.1002/jmor.1051670108
- 1737 237. Ahlgren JA, Cheng C-HC, Schrag JD, DeVries AL. Freezing avoidance and the distribution of antifreeze  
1738 glycopeptides in body fluids and tissues of antarctic fish. *The Journal of Experimental Biology*. 1988;137:  
1739 549–563. Available:  
1740 <https://jeb.biologists.org/content/137/1/549>; <http://www.ncbi.nlm.nih.gov/pubmed/3209974>;  
1741 <http://jeb.biologists.org/content/jexbio/137/1/549.full.pdf>; <https://lens.org/037-884-838-398-382>
- 1742 238. O’Grady SM, Schrag JD, Raymond JA, Devries AL. Comparison of antifreeze glycopeptides from arctic and  
1743 antarctic fishes. *Journal of Experimental Zoology*. 1982;224: 177–185. doi:10.1002/jez.1402240207
- 1744 239. Boris R, L DA, Amir A. Interaction of thermal hysteresis proteins with cells and cell membranes and  
1745 associated applications [Internet]. US 5358931 A, 1994. Available: <https://lens.org/118-292-692-874-346>
- 1746 240. Sidell BD, O’Brien KM. When bad things happen to good fish: The loss of hemoglobin and myoglobin  
1747 expression in antarctic icefishes. *The Journal of Experimental Biology*. 2006;209: 1791–1802.  
1748 doi:10.1242/jeb.02091
- 1749 241. Sidell BD, Vayda ME, Small D, Moylan TJ, Londraville RL, Yuan ML, et al. Variable expression of myoglobin  
1750 among the hemoglobinless antarctic icefishes. *Proceedings of the National Academy of Sciences of the United*  
1751 *States of America*. 1997;94: 3420–3424. doi:10.1073/pnas.94.7.3420
- 1752 242. Iii DWH, A YD. Isolation of novel hemopoietic genes by representational difference analysis [Internet].  
1753 WO 2001/009387 A1, 2001. Available: <https://lens.org/031-982-165-841-01X>
- 1754 243. Dunlap WC, Fujisawa A, Yamamoto Y, Moylan TJ, Sidell BD. Notothenioid fish, krill and phytoplankton  
1755 from antarctica contain a vitamin e constituent ( $\alpha$ -tocomonoenol) functionally associated with cold-water  
1756 adaptation. *Comparative Biochemistry and Physiology B*. 2002;133: 299–305. doi:10.1016/s1096-  
1757 4959(02)00150-1
- 1758 244. Adrien B. Method for preventing the oxidation of lipids in animal and vegetable oils and compositions  
1759 produced by the method thereof [Internet]. WO 2005/075613 A1, 2005. Available: <https://lens.org/138-170-683-945-173>

- 1761 245. Karin B, Christian B, Alois F, Ulrich R. Surfaces with immobilized enzymes or anti-icing proteins  
1762 [Internet]. WO 2009/136186 A1, 2009. Available: <https://lens.org/045-984-219-947-619>
- 1763 246. Han YJ, Chan KI, Kyu KD, Jong HS, Seok LH, Bhattarai HD, et al. Pharmaceutical and food compositions for  
1764 preventing or treating diabetes or obesity [Internet]. EP 2617464 A1, 2013. Available: [https://lens.org/149-](https://lens.org/149-447-807-703-634)  
1765 [https://worldwide.espacenet.com/patent/search/family/045928177/publication/EP2617464A1?q=EP2617](https://worldwide.espacenet.com/patent/search/family/045928177/publication/EP2617464A1?q=EP2617464A1)  
1766 [464A1](https://worldwide.espacenet.com/patent/search/family/045928177/publication/EP2617464A1?q=EP2617464A1)  
1767
- 1768 247. Seo C, Sohn JH, Ahn JS, Yim JH, Lee HK, Oh H. Protein tyrosine phosphatase 1B inhibitory effects of  
1769 depsidone and pseudodepsidone metabolites from the antarctic lichen stereocaulon alpinum. *Bioorganic &*  
1770 *Medicinal Chemistry Letters*. 2009;19: 2801–2803. doi:10.1016/j.bmcl.2009.03.108
- 1771 248. J BB, N SL, Bruce MJ, D AC, Lee FJ, G WC, et al. Mrsa biofilm inhibition [Internet]. WO 2017/177142 A1,  
1772 2017. Available: <https://lens.org/023-299-861-368-725>
- 1773 249. Salm JL von, Witowski CG, Fleeman R, McClintock JB, Amsler CD, Shaw LN, et al. Darwinolide, a new  
1774 diterpene scaffold that inhibits methicillin-resistant staphylococcus aureus biofilm from the antarctic sponge  
1775 *dendrilla membranosa*. *Organic Letters*. 2016;18: 2596–2599. doi:10.1021/acs.orglett.6b00979
- 1776 250. Morawala PV, Renuka J, Manohar S, Lakshmi S. Identification and characterization of natural chemical  
1777 entities by liquid chromatography and mass spectrometry lc-ms/ms and uses thereof [Internet]. WO  
1778 2011/058423 A2, 2011. Available: <https://lens.org/014-621-154-445-417>
- 1779 251. Makoto S, Marie BE. Cobalamin acquisition protein and use thereof [Internet]. WO 2013/166075 A1,  
1780 2013. Available: <https://lens.org/148-837-872-714-310>
- 1781 252. Han YJ, Il-chan K, Jong HS, Joung YU, Kum LH, Jin KS, et al. Cryoprotective agent containing  
1782 exopolysaccharide from pseudoalteromonas sp. Cy01 [Internet]. WO 2018/207988 A1, 2018. Available:  
1783 <https://lens.org/184-778-733-200-481>
- 1784 253. Oldham PD, Burton G. Defusing disclosure in patent applications. *SSRN Electronic Journal*. 2010; null-  
1785 null. doi:10.2139/ssrn.1694899
- 1786 254. WIPO. Key questions on patent disclosure requirements for genetic resources and traditional knowledge  
1787 [Internet]. Geneva: WIPO; 2017 pp. 1–94. Available:  
1788 [https://www.wipo.int/edocs/pubdocs/en/wipo\\_pub\\_1047.pdf](https://www.wipo.int/edocs/pubdocs/en/wipo_pub_1047.pdf)
- 1789 255. Guerry AD, Polasky S, Lubchenco J, Chaplin-Kramer R, Daily GC, Griffin RJ, et al. Natural capital and  
1790 ecosystem services informing decisions: From promise to practice. *Proceedings of the National Academy of*  
1791 *Sciences of the United States of America*. 2015;112: 7348–7355. doi:10.1073/pnas.1503751112
- 1792 256. Division UNS. Natural capital accounting and valuation of ecosystem services project [Internet].  
1793 electronic; 2020. Available: <https://seea.un.org/home/Natural-Capital-Accounting-Project>
- 1794 257. Engel S, Pagiola S, Wunder S. Designing payments for environmental services in theory and practice: An  
1795 overview of the issues. *Ecological Economics*. 2008;65: 663–674. doi:10.1016/j.ecolecon.2008.03.011

---

<sup>i</sup> <https://www.microsoft.com/en-us/research/project/microsoft-academic-graph/>
